# Supplementary material for: Metal–organic framework mediated expeditious synthesis of benzimidazole and benzothiazole derivatives through an oxidative cyclization pathway
Source: Royal Society of Chemistry journal article supplement (doi:10.1039/c9nj04431k), 2019-12-11

## Supplementary Information

### **Metal-organic framework mediated expeditious synthesis of benzimidazole and benzothiazole derivatives through oxidative cyclization pathway**

**Velayutham Sankar<sup>#a</sup>, Peramaiah Karthik<sup>#a</sup>, Bernaurdshaw Neppolian<sup>\*a</sup>, Bitragunta Sivakumar<sup>\*a,b</sup>**

<sup>\*a</sup>Department of Chemistry and SRM Research Institute, SRM Institute of Science and Technology, Kattankulathur, Chennai- 603203, Tamil Nadu, India.

<sup>\*a,b</sup>Department of Chemistry, SRM University AP-Amaravati, Guntur, Andhra Pradesh- 522502. India.

\*E-mail: : [badursiva@gmail.com](mailto:badursiva@gmail.com); [neppolian.b@res.srmuniv.ac.in](mailto:neppolian.b@res.srmuniv.ac.in)

<sup>#</sup>Equally Contributed

## FESEM and EDX images

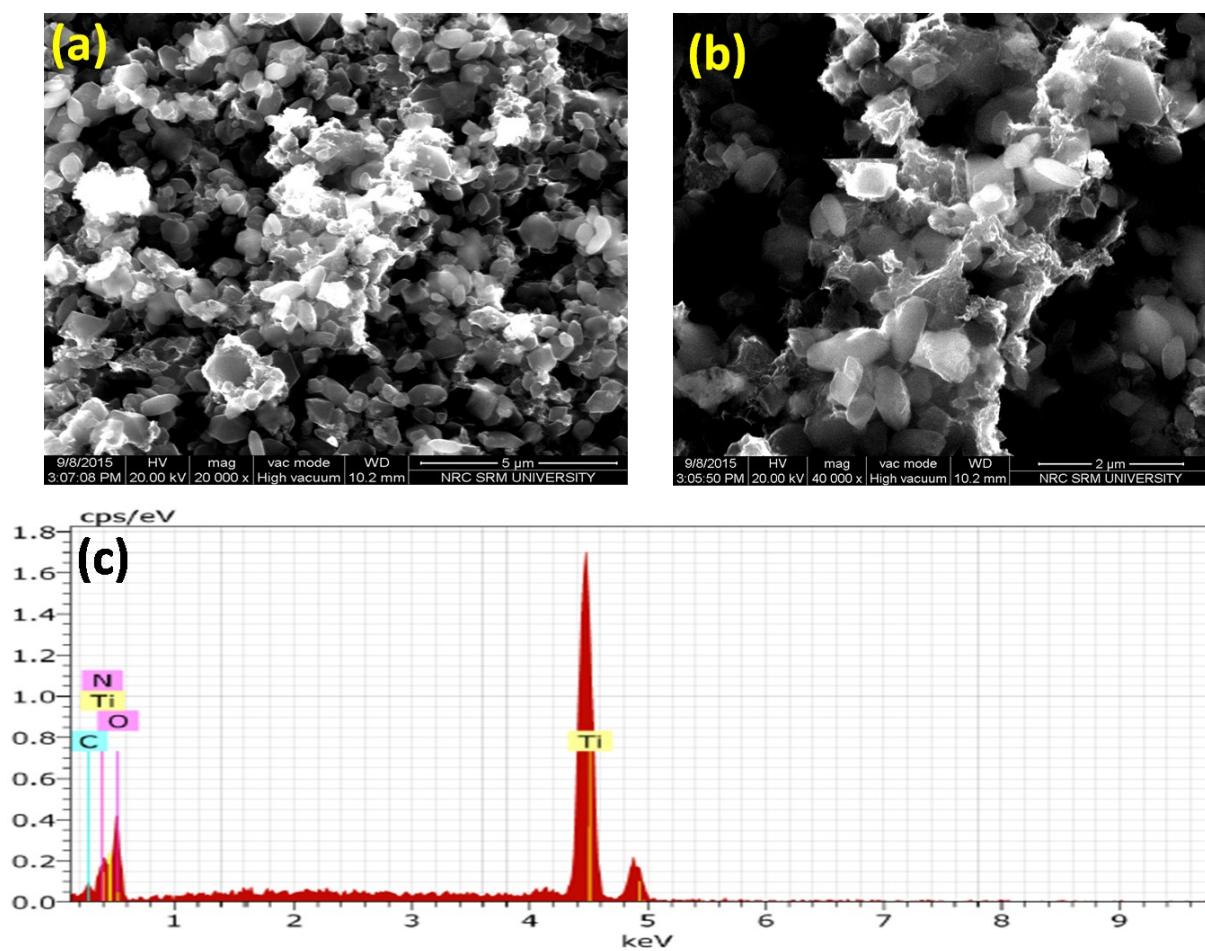

Fig. S1. (a, b) FESEM images and (c) EDX analysis of synthesized  $\text{NH}_2\text{-MIL-125(Ti)}$  MOF

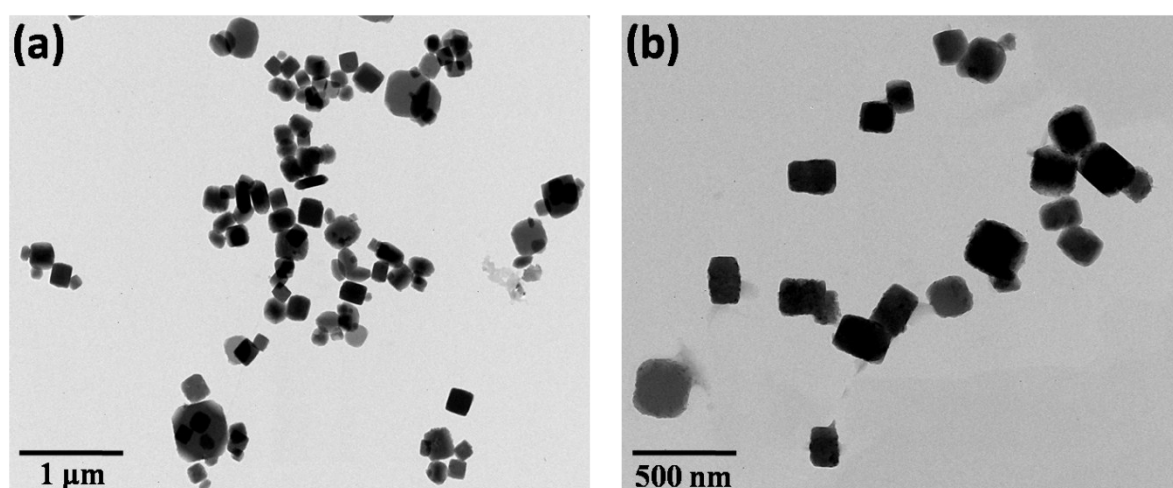

Fig. S2. (a, b) TEM images of synthesized  $\text{NH}_2\text{-MIL-125(Ti)}$  MOF

### XRD and FTIR images

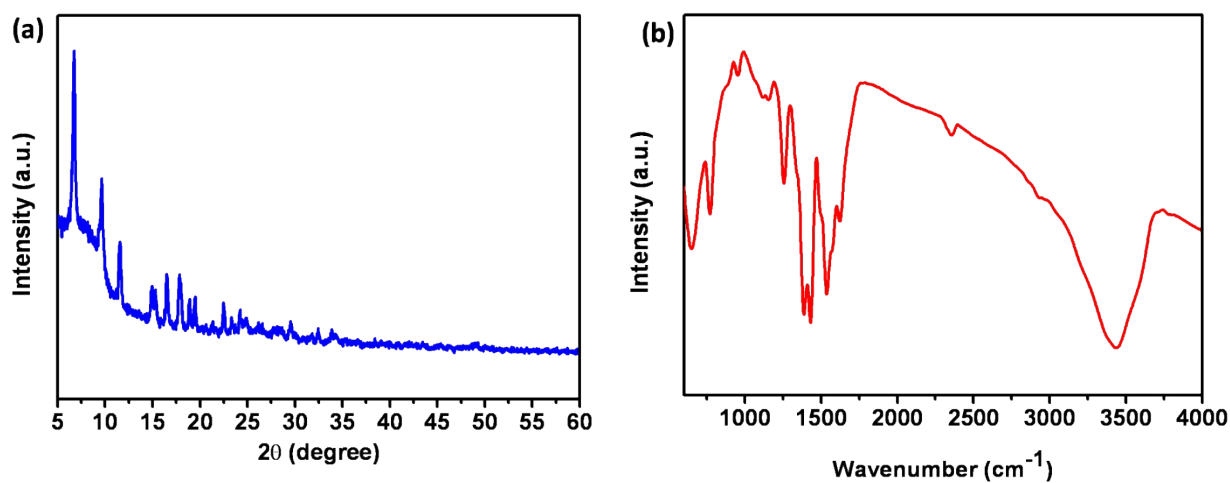

**Fig. S3.** (a) X-ray diffraction pattern and (b) FTIR studies of synthesized  $\text{NH}_2\text{-MIL-125(Ti)}$  MOF

### UV-vis DRS and BET images

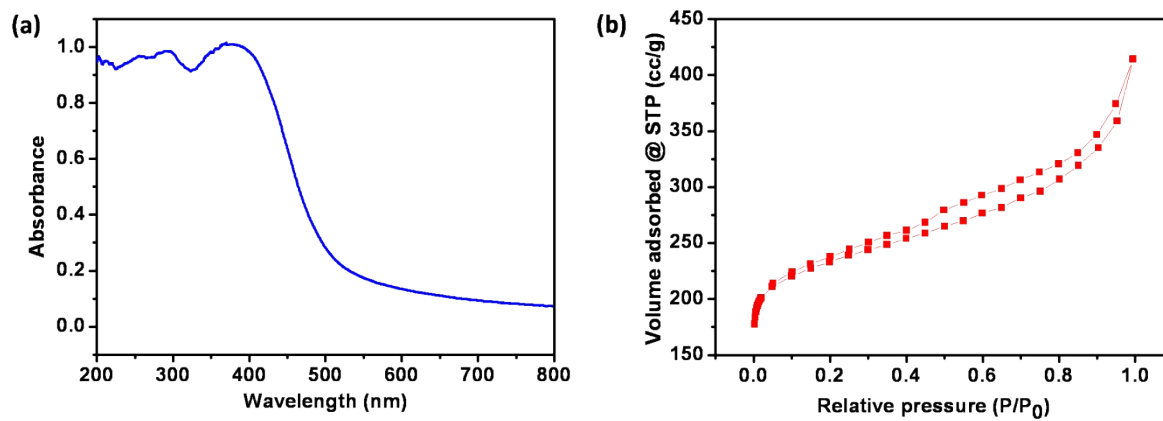

**Fig. S4.** (a) UV-vis DRS spectra and (b) BET analysis of  $\text{NH}_2\text{-MIL-125(Ti)}$  MOF

| Name of samples                  | $S_{\text{BET}}$ ( $\text{m}^2 \text{g}^{-1}$ ) | Pore volume ( $\text{cc/g}$ ) |
|----------------------------------|-------------------------------------------------|-------------------------------|
| $\text{NH}_2\text{-MIL-125(Ti)}$ | 710                                             | 0.649                         |

## Recyclability and FT-IR images

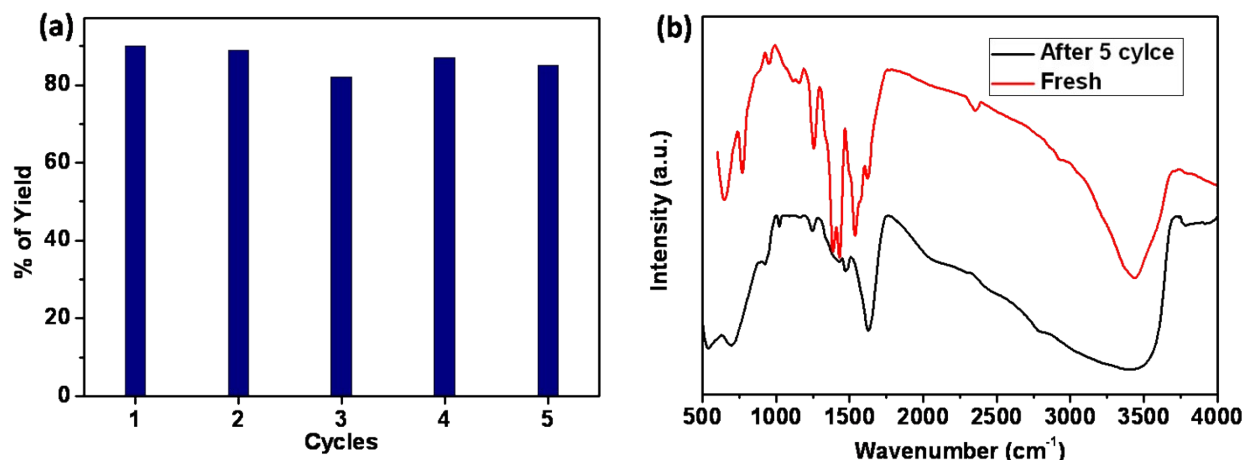

**Fig S5.** (a) Recyclability study of NH<sub>2</sub>-MIL-125(Ti) MOF for synthesis of benimidazole (b) FT-IR spectra of NH<sub>2</sub>-MIL-125(Ti) MOF before and after 5<sup>th</sup>recycle.

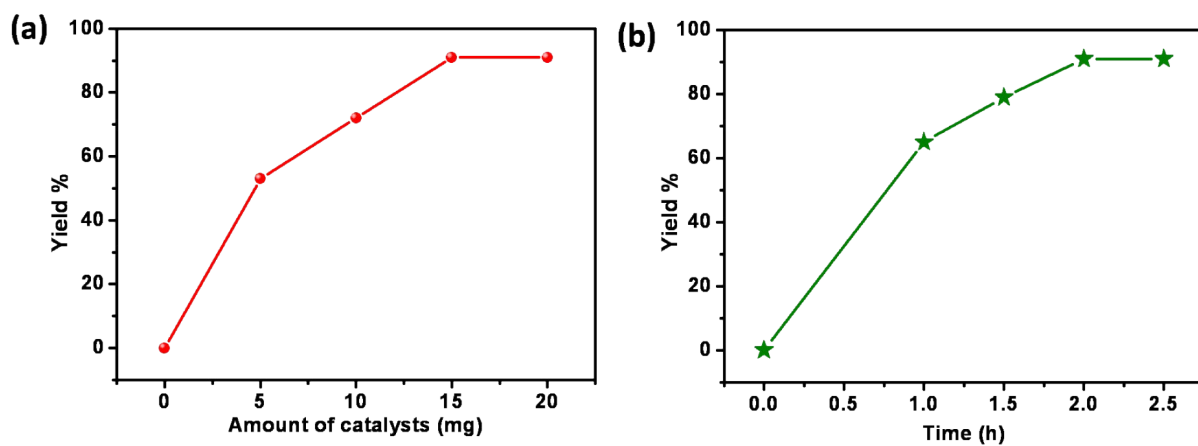

**Fig S6.** (a) Effect of different amount of catalyst and (b) reaction time on synthesis of benzimidazole

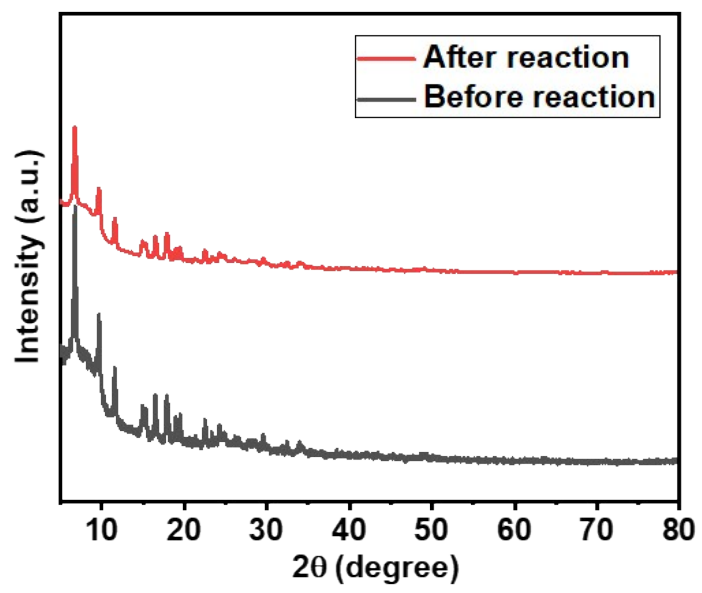

## Spectral data of products.

### 1a. 2-phenylbenzo[d]thiazole

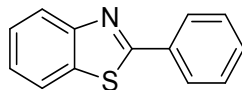

White crystals; IR (ATR  $\text{cm}^{-1}$ ): 3066, 1556, 1474, 1316, 1074, 960, 756;  $^1\text{H}$  NMR (500 MHz,  $\text{CDCl}_3$ )  $\delta$  8.17 – 8.08 (m, 3H), 7.93 (d,  $J = 7.9$  Hz, 1H), 7.58 – 7.47 (m, 4H), 7.41 (t,  $J = 7.1$  Hz, 1H);  $^{13}\text{C}$  NMR (126 MHz,  $\text{CDCl}_3$ )  $\delta$  168.10, 154.17, 135.09, 133.65, 131.00, 129.05, 127.59, 126.35, 125.22, 123.27, 121.65.

### 2a. 2-(2-bromophenyl)benzo[d]thiazole

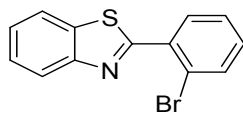

Yellow solid; IR (ATR  $\text{cm}^{-1}$ ): 2923, 1589, 959, 752;  $^1\text{H}$  NMR (500 MHz,  $\text{CDCl}_3$ )  $\delta$  8.11 – 8.08 (m, 2H), 7.91 (d,  $J = 8.0$  Hz, 1H), 7.52 – 7.47 (m, 4H), 7.39 (t,  $J = 7.0$  Hz, 1H);  $^{13}\text{C}$  NMR (126 MHz,  $\text{CDCl}_3$ )  $\delta$  167.04, 153.07, 134.00, 132.55, 129.93, 127.98, 126.51, 125.27, 124.15, 122.18, 120.57.

### 3a. 2-(benzo[d]thiazole-2-yl)phenol

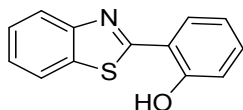

White solid;  $^1\text{H}$  NMR (500 MHz,  $\text{CDCl}_3$ )  $\delta$  12.41 (s, 1H), 7.86 (d,  $J = 8.2$  Hz, 1H), 7.76 (d,  $J = 8.0$  Hz, 1H), 7.56 (d,  $J = 7.8$  Hz, 1H), 7.38 (t,  $J = 7.7$  Hz, 1H), 7.30 – 7.25 (m, 2H), 7.00 (d,  $J = 8.3$  Hz, 1H), 6.83 (t,  $J = 7.5$  Hz, 1H);  $^{13}\text{C}$  NMR (126 MHz,  $\text{CDCl}_3$ )  $\delta$  168.28, 156.86, 150.73, 131.67, 131.50, 127.33, 125.60, 124.45, 121.08, 120.42, 118.44, 116.78, 115.69.

#### 4a. 2-(p-tolyl)benzo[d]thiazole

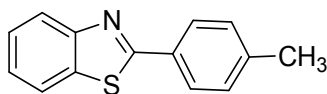

White solid; IR (ATR  $\text{cm}^{-1}$ ): 2919, 1603, 1482, 1310, 959, 817;  $^1\text{H}$  NMR (500 MHz,  $\text{CDCl}_3$ )  $\delta$  7.98 (d,  $J = 8.1$  Hz, 1H), 7.91 (d,  $J = 8.1$  Hz, 2H), 7.81 (d,  $J = 7.9$  Hz, 1H), 7.40 (t,  $J = 7.4$  Hz, 1H), 7.29 (t,  $J = 7.5$  Hz, 1H), 7.22 (d,  $J = 7.9$  Hz, 2H), 2.35 (s, 3H);  $^{13}\text{C}$  NMR (126 MHz,  $\text{CDCl}_3$ )  $\delta$  168.28, 154.17, 141.46, 134.95, 130.96, 129.74, 127.50, 126.26, 125.02, 123.06, 121.59, 22.72.

#### 5a. 4-(benzo[d]thiazol-2-yl)-N,N-dimethylaniline

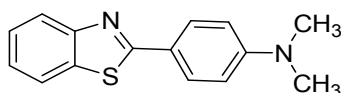

White solid; IR (ATR  $\text{cm}^{-1}$ ): 2927, 1610, 1524, 1203, 1067, 810, 738;  $^1\text{H}$  NMR (500 MHz,  $\text{CDCl}_3$ )  $\delta$  7.99-7.95 (m, 3H), 7.84 (d,  $J = 7.4$  Hz, 1H), 7.43 (t,  $J = 7.1$  Hz, 1H), 7.30 (t,  $J = 7.0$  Hz, 1H), 6.74 (d,  $J = 9.0$  Hz, 2H), 3.05 (s, 6H);  $^{13}\text{C}$  NMR (126 MHz,  $\text{CDCl}_3$ )  $\delta$  168.86, 154.34, 152.20, 134.51, 128.90, 126.02, 124.22, 122.26, 121.37, 111.71, 40.21.

#### 6a. 2-(4-methoxyphenyl)benzo[d]thiazol

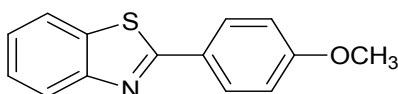

White solid;  $^1\text{H}$  NMR (500 MHz,  $\text{CDCl}_3$ )  $\delta$  8.06 – 8.00 (m, 3H), 7.88 (d,  $J = 7.4$  Hz, 1H), 7.47 (t,  $J = 7.7$  Hz, 1H), 7.35 (t,  $J = 7.0$  Hz, 1H), 7.00 (d,  $J = 8.9$  Hz, 2H), 3.88 (s, 3H);  $^{13}\text{C}$  NMR (126 MHz,  $\text{CDCl}_3$ )  $\delta$  167.92, 161.94, 154.15, 134.87, 129.14, 126.24, 124.91, 124.82, 122.84, 121.54, 121.18, 114.39, 56.07.

### 7a. 2-(3,4-dimethoxyphenyl)benzo[d]thiazol

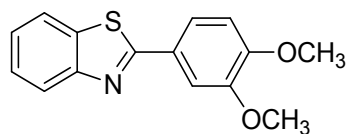

White solid;  $^1\text{H}$  NMR (500 MHz,  $\text{CDCl}_3$ )  $\delta$  8.04 (d,  $J = 7.8$  Hz, 1H), 7.88 (d,  $J = 8.0$  Hz, 1H), 7.71 (s, 1H), 7.61 (d,  $J = 10.4$  Hz, 1H), 7.48 (t,  $J = 8.3$  Hz, 1H), 7.36 (t,  $J = 7.0$  Hz, 1H), 6.95 (d,  $J = 8.4$  Hz, 1H), 4.03 (s, 3H), 3.96 (s, 3H);  $^{13}\text{C}$  NMR (126 MHz,  $\text{CDCl}_3$ )  $\delta$  167.91, 161.93, 154.22, 134.86, 129.13, 126.44, 126.23, 124.82, 122.83, 121.54, 114.39, 55.50, 55.48.

### 8a. 2-(benzo[d]thiazol-2-yl)-5-methoxyphenol

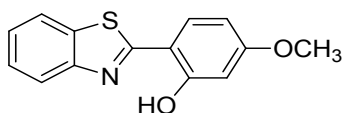

White solid;  $^1\text{H}$  NMR (500 MHz,  $\text{CDCl}_3$ )  $\delta$  12.65 (s, 1H), 7.80 (dd,  $J = 34.9, 8.1$  Hz, 2H), 7.48 (d,  $J = 8.6$  Hz, 1H), 7.38 (t,  $J = 7.7$  Hz, 1H), 7.27 (t,  $J = 7.1$  Hz, 1H), 6.51 (d,  $J = 2.5$  Hz, 1H), 6.44 (dd,  $J = 8.7, 2.5$  Hz, 1H), 3.77 (s, 3H);  $^{13}\text{C}$  NMR (126 MHz,  $\text{CDCl}_3$ )  $\delta$  168.22, 162.38, 158.91, 150.79, 131.11, 128.56, 125.49, 123.96, 120.62, 120.34, 109.34, 106.62, 100.27, 54.43.

### 9a. 2-([1,1'-biphenyl]-4-yl)benzo[d]thiazole

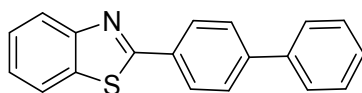

Yellow solid;  $^1\text{H}$  NMR (500 MHz,  $\text{CDCl}_3$ )  $\delta$  8.13 (dd,  $J = 37.7, 8.2$  Hz, 2H), 7.92 (d,  $J = 8.0$  Hz, 1H), 7.69 (dd,  $J = 34.3, 7.9$  Hz, 3H), 7.58 (dd,  $J = 10.2, 7.9$  Hz, 2H), 7.52 – 7.33 (m, 5H);  $^{13}\text{C}$  NMR (126 MHz,  $\text{CDCl}_3$ )  $\delta$  167.75, 154.22, 143.75, 140.08, 135.08, 132.51, 128.97, 128.02, 127.99, 127.68, 127.15, 126.40, 125.23, 123.22, 121.66.

### 10a. 2-Phenylbenzimidazole



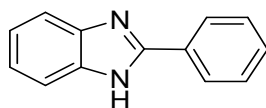

Yellow solid; IR (ATR  $\text{cm}^{-1}$ ): 2926, 1442, 1274, 1110, 977, 741;  $^1\text{H}$  NMR (500 MHz, DMSO)  $\delta$  8.20 (d,  $J = 8.3$  Hz, 2H), 7.72 – 7.42 (m, 5H), 7.21 (d,  $J = 3.8$  Hz, 2H);  $^{13}\text{C}$  NMR (126 MHz, DMSO)  $\delta$  151.69, 144.23, 135.49, 133.28, 130.64, 130.31, 129.42, 126.90, 122.17, 119.41, 111.74. MS (ESI):  $m/z$  195  $[\text{M} + \text{H}]^+$

### 11a. 2-(2-bromophenyl)-1H-benzo[d]imidazole

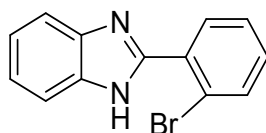

Brown solid;  $^1\text{H}$  NMR (500 MHz, DMSO)  $\delta$  8.21 (d,  $J = 7.2$  Hz, 2H), 7.62 – 7.49 (m, 4H), 7.22 (dd,  $J = 5.8, 3.0$  Hz, 2H);  $^{13}\text{C}$  NMR (126 MHz, DMSO)  $\delta$  151.70, 133.28, 130.65, 130.30, 129.74, 129.42, 129.02, 126.91, 122.70, 119.75, 111.57.

### 12a. 2-(4-chlorophenyl)-1H-benzo[d]imidazole

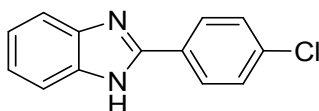

White solid;  $^1\text{H}$  NMR (500 MHz, DMSO)  $\delta$  8.19 (d,  $J = 8.1$  Hz, 2H), 7.66 (dd,  $J = 17.6, 8.0$  Hz, 3H), 7.54 (d,  $J = 7.7$  Hz, 1H), 7.22 (dt,  $J = 14.9, 7.2$  Hz, 2H);  $^{13}\text{C}$  NMR (126 MHz, DMSO)  $\delta$  150.62, 144.07, 135.41, 135.02, 129.57, 129.39, 128.61, 123.34, 122.40, 119.37, 111.92.

### 13a. 3-(1H-benzo[d]imidazol-2-yl)benzoic acid

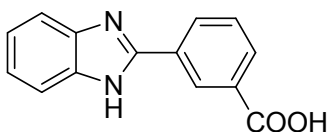

Brown solid;  $^1\text{H}$  NMR (500 MHz, DMSO)  $\delta$  13.10 (s, 1H), 8.79 (s, 1H), 8.42 (d,  $J = 7.7$  Hz, 1H), 8.05 (d,  $J = 7.6$  Hz, 1H), 7.65 (dd,  $J = 40.6, 32.9$  Hz, 3H), 7.22 (d,  $J = 3.1$  Hz, 2H);  $^{13}\text{C}$  NMR (126 MHz, DMSO)  $\delta$  167.43, 150.82, 132.07, 130.98, 130.91, 129.82, 127.66.

**14a. 2-(3,4-dimethoxyphenyl)-1H-benzo(d)imidazole**

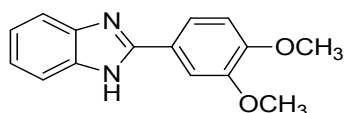

Yellow solid; IR (ATR  $\text{cm}^{-1}$ ): 2948, 1610, 1427, 1264, 836, 731;  $^1\text{H}$  NMR (500 MHz,  $\text{CDCl}_3$ )  $\delta$  7.76 (s, 1H), 7.66 (d,  $J = 9.7$  Hz, 1H), 7.60 (dd,  $J = 5.4, 3.1$  Hz, 2H), 7.22 (dd,  $J = 6.4, 3.5$  Hz, 2H), 6.87 (d,  $J = 8.3$  Hz, 1H), 3.89 (s, 3H), 3.77 (s, 3H);  $^{13}\text{C}$  NMR (126 MHz,  $\text{CDCl}_3$ )  $\delta$  152.31, 150.76, 149.36, 142.57, 139.06, 128.89, 123.26, 122.81, 122.51, 121.87, 119.56, 118.11, 114.85, 111.20, 109.77, 55.93, 55.58.

**15a. 2-(p-tolyl)-1H-benzo[d]imidazole**

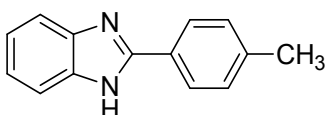

White solid;  $^1\text{H}$  NMR (500 MHz,  $\text{CDCl}_3$ )  $\delta$  8.00 (d,  $J = 8.1$  Hz, 2H), 7.54 (s, 2H), 7.21 (d,  $J = 8.2$  Hz, 2H), 7.13 (dd,  $J = 6.0, 3.1$  Hz, 2H), 2.33 (s, 3H);  $^{13}\text{C}$  NMR (126 MHz, DMSO)  $\delta$  151.84, 140.02, 129.98, 129.80, 129.57, 127.92, 126.85, 21.44. MS (ESI):  $m/z$  209  $[\text{M} + \text{H}]^+$

**16a. 4-(1H-benzo[d]imidazole-2-yl)-N,N-dimethylaniline**

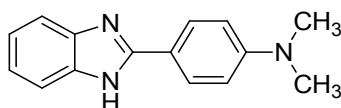

Brown solid;  $^1\text{H}$  NMR (500 MHz,  $\text{CDCl}_3$ )  $\delta$  7.81 (d,  $J = 8.0$  Hz, 1H), 7.63 (d,  $J = 8.9$  Hz, 1H), 7.33 – 7.13 (m, 3H), 7.02 (d,  $J = 8.7$  Hz, 1H), 6.71 (dd,  $J = 25.7, 8.8$  Hz, 2H), 3.01 (s, 3H),

2.93 (s, 3H);  $^{13}\text{C}$  NMR (126 MHz,  $\text{CDCl}_3$ )  $\delta$  154.99, 151.26, 150.01, 136.33, 130.33, 126.95, 124.30, 122.20, 119.22, 112.82, 111.83, 110.41, 40.54, 40.20.

**17a. 2-([1,1'-biphenyl]-4-yl)-1H-benzo[d]imidazole**

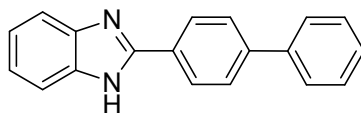

Yellow solid; IR (ATR  $\text{cm}^{-1}$ ): 3056, 1428, 1231, 966, 695;  $^1\text{H}$  NMR (500 MHz,  $\text{CDCl}_3$ )  $\delta$  8.13 (d,  $J = 7.3$  Hz, 2H), 7.69 (dd,  $J = 44.1, 7.5$  Hz, 6H), 7.47 (t,  $J = 7.0$  Hz, 2H), 7.39 (t,  $J = 7.2$  Hz, 1H), 7.33 – 7.28 (m, 2H);  $^{13}\text{C}$  NMR (126 MHz, DMSO)  $\delta$  151.40, 144.40, 141.77, 139.73, 135.53, 129.62, 129.51, 128.38, 127.62, 127.48, 127.17, 123.06, 122.21, 119.34, 111.81. MS (ESI):  $m/z$  271  $[\text{M} + \text{H}]^+$

**18a. 2-butyl-1H-benzo[d]imidazole**

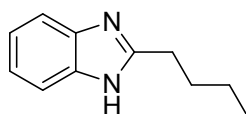

White solid;  $^1\text{H}$  NMR (500 MHz,  $\text{CDCl}_3$ )  $\delta$  7.55 (dd,  $J = 6.0, 3.2$  Hz, 2H), 7.21 (dd,  $J = 6.0, 3.2$  Hz, 2H), 3.01 – 2.85 (m, 2H), 1.84 (dt,  $J = 15.3, 7.6$  Hz, 2H), 1.48 – 1.31 (m, 2H), 0.90 (t,  $J = 7.4$  Hz, 3H).  $^{13}\text{C}$  NMR (126 MHz,  $\text{CDCl}_3$ )  $\delta$  155.31, 138.38, 122.19, 114.59, 30.33, 29.02, 22.43, 13.73.

**19a. 2-ethyl-1H-benzo[d]imidazole**

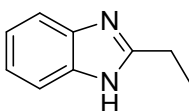

Yellow solid;  $^1\text{H}$  NMR (500 MHz,  $\text{CDCl}_3$ )  $\delta$  7.56 (dd,  $J = 6.0, 3.2$  Hz, 2H), 7.21 (dd,  $J = 6.1, 3.1$  Hz, 2H), 3.00 (q,  $J = 7.6$  Hz, 2H), 1.43 (t,  $J = 7.6$  Hz, 3H).  $^{13}\text{C}$  NMR (126 MHz,  $\text{CDCl}_3$ )  $\delta$  156.79, 138.43, 122.16, 114.57, 22.56, 12.56.

## $^1\text{H}$ , $^{13}\text{C}$ NMR Spectral analysis of products.

### 1a. 2-phenylbenzo[d]thiazole

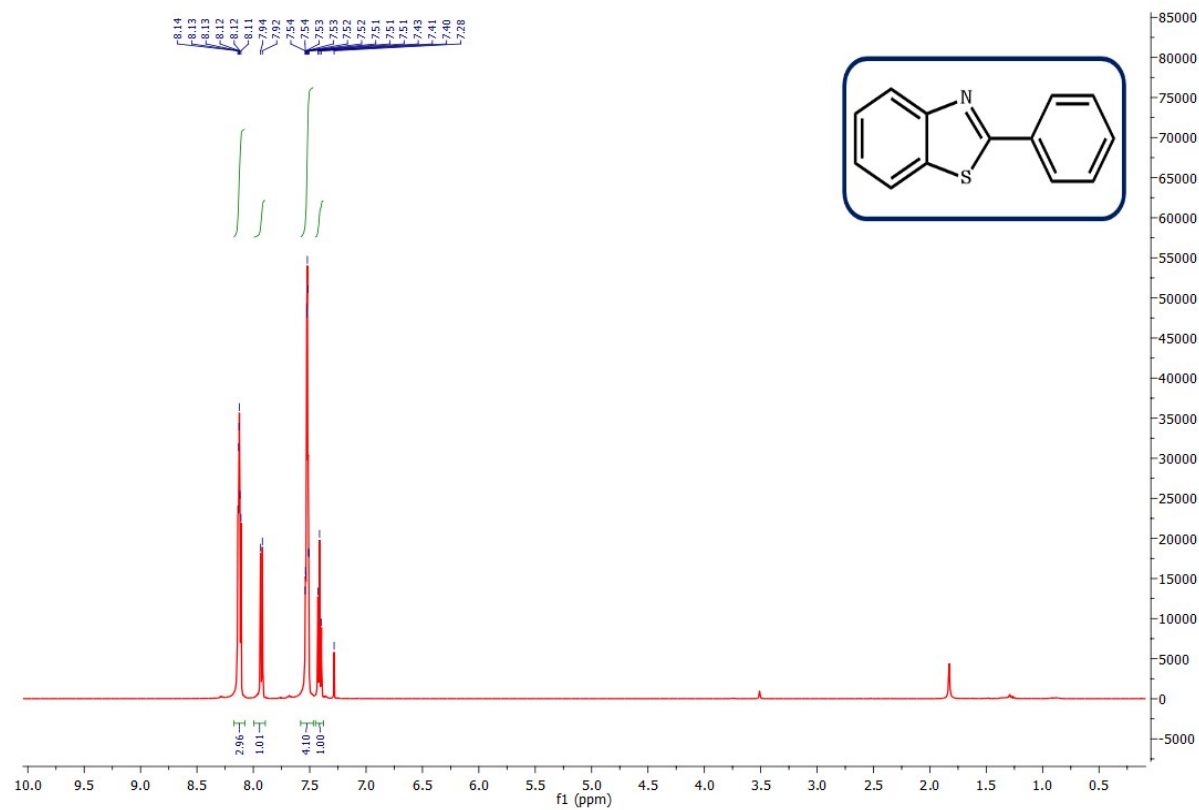

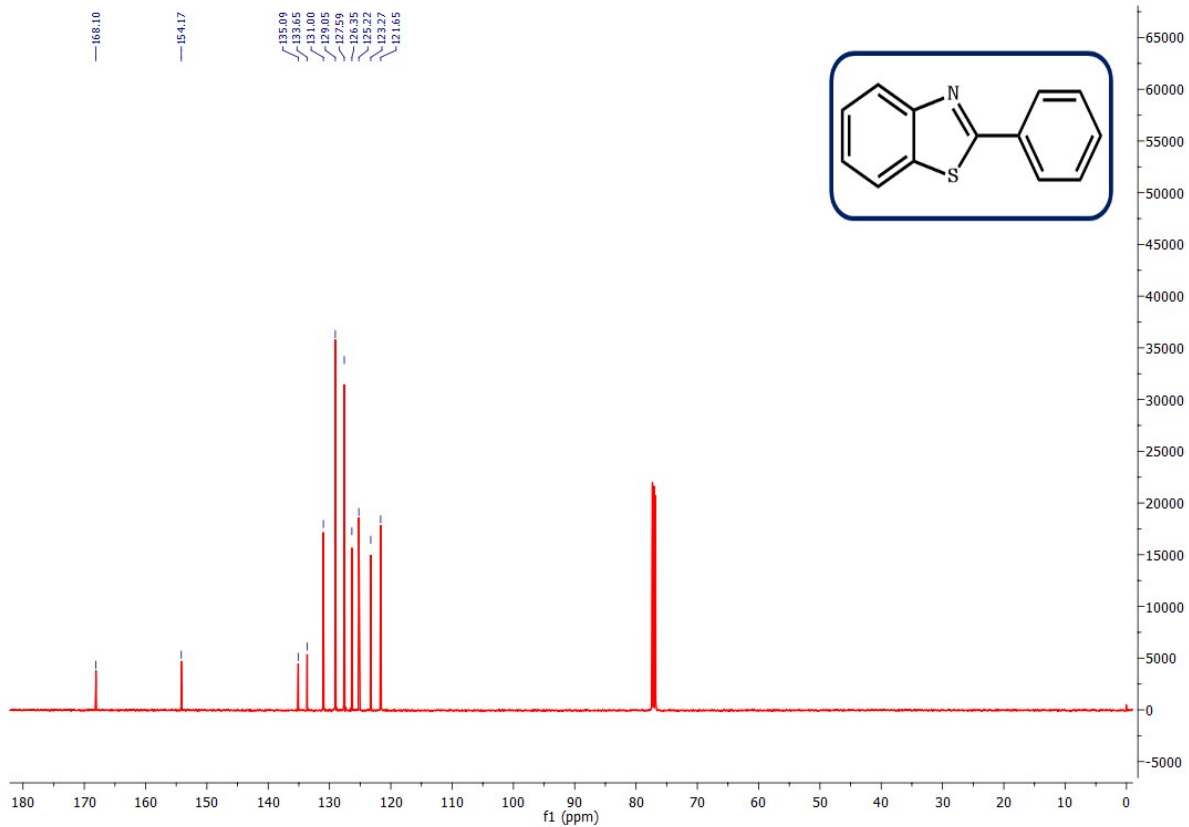

**2a. 2-(2-bromophenyl)benzo[d]thiazole**

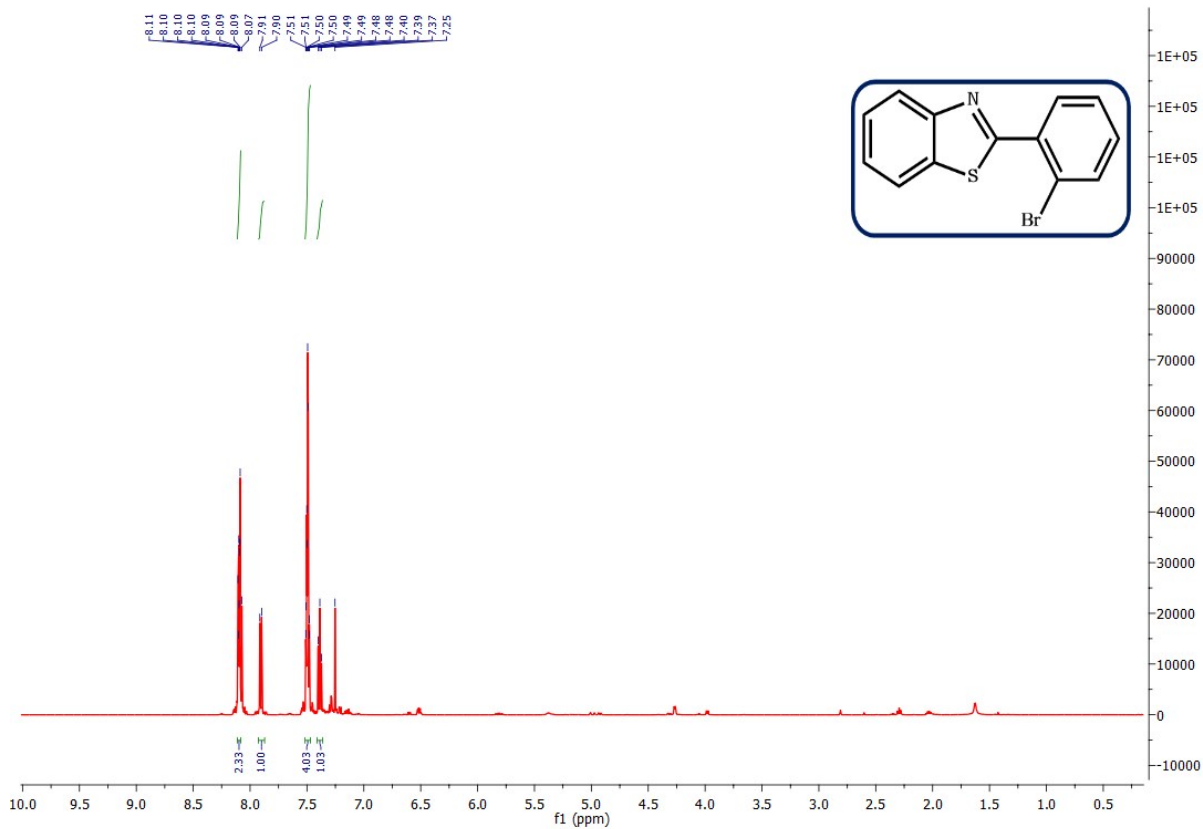

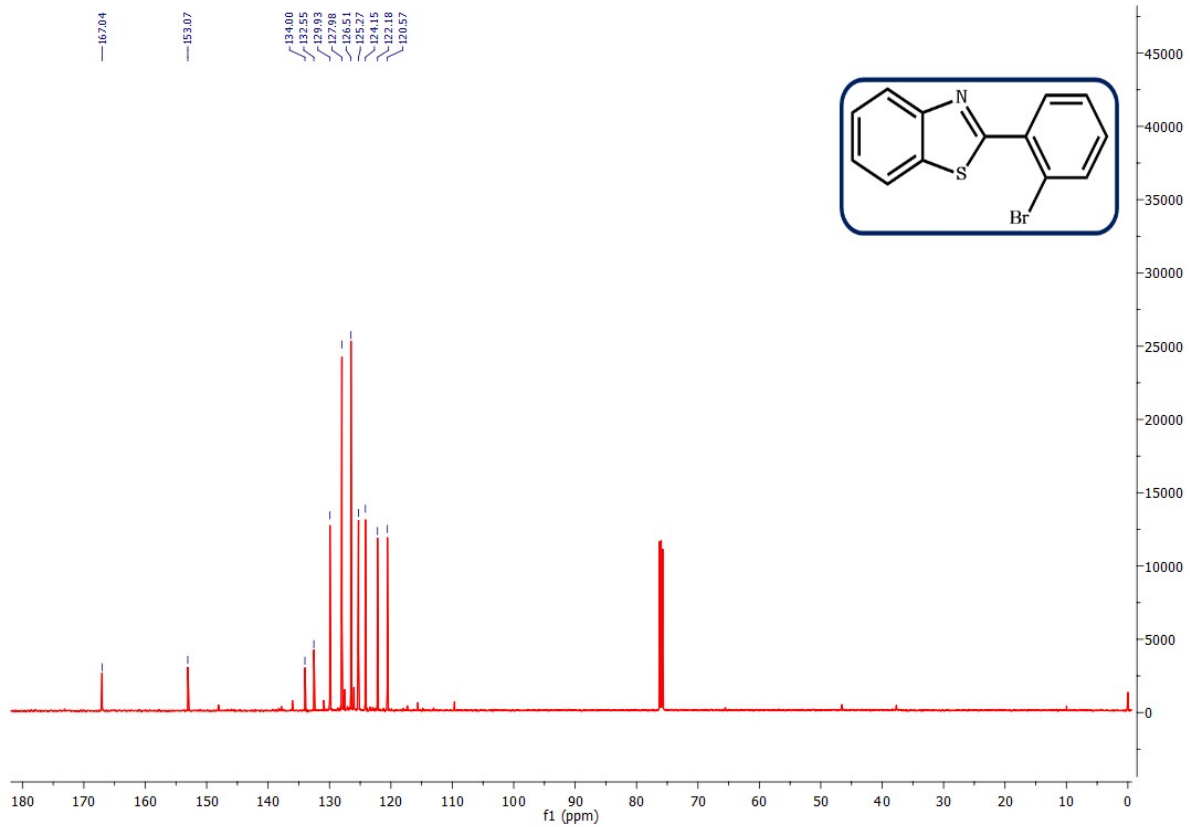

### 3a.2-(benzo[d]thiazole-2-yl)phenol

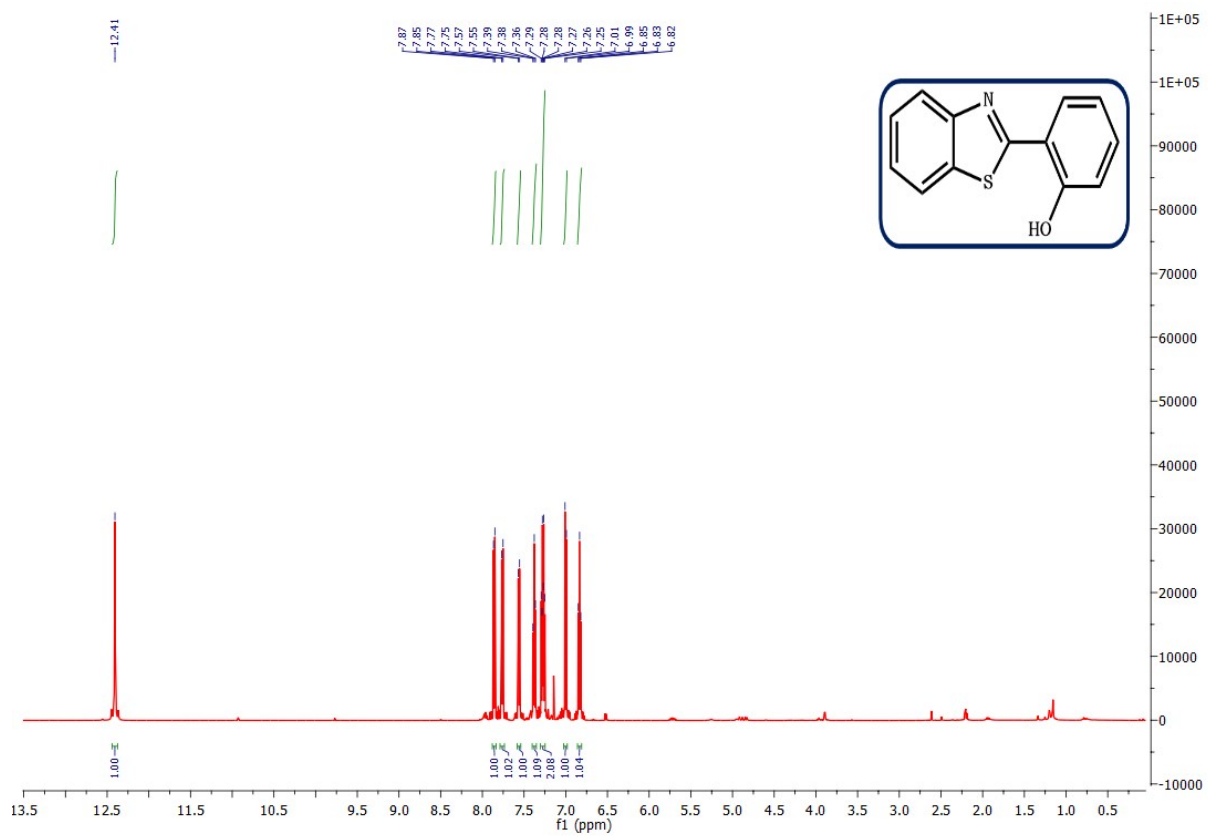

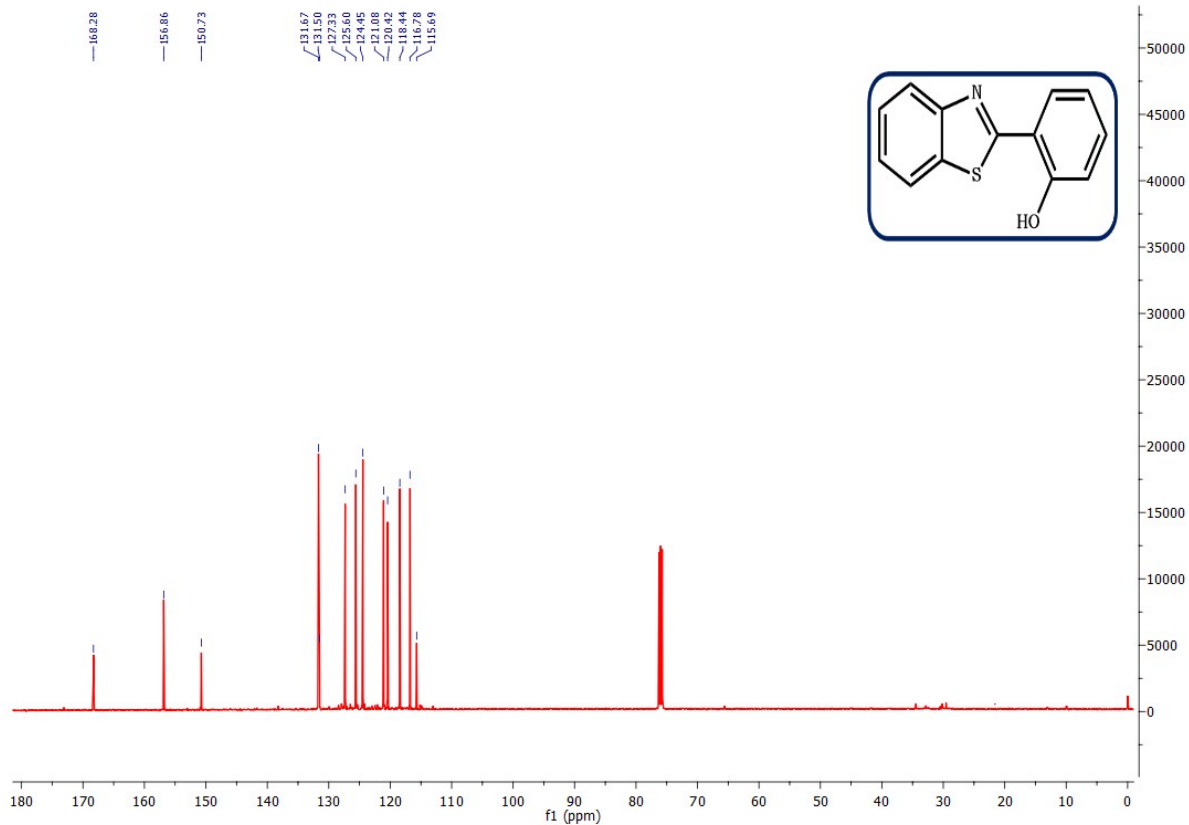

#### 4a. 2-(p-tolyl)benzo[d]thiazole

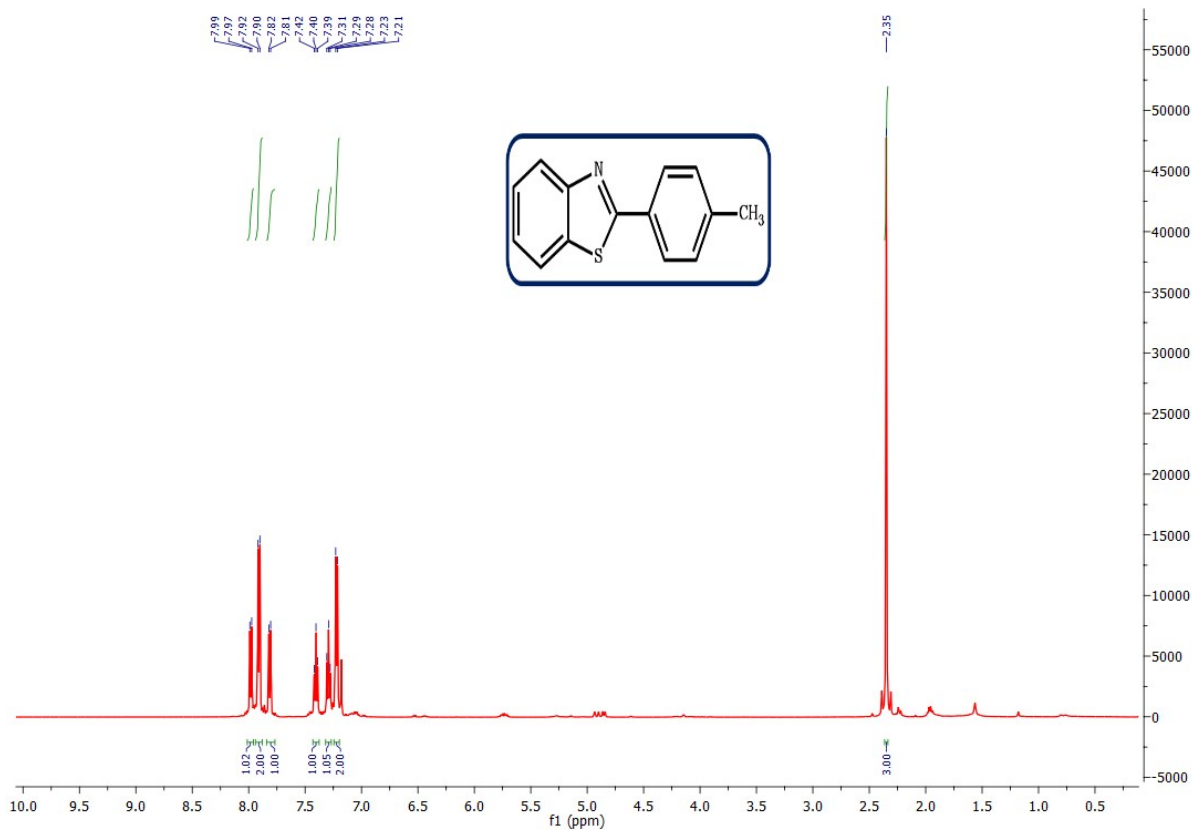

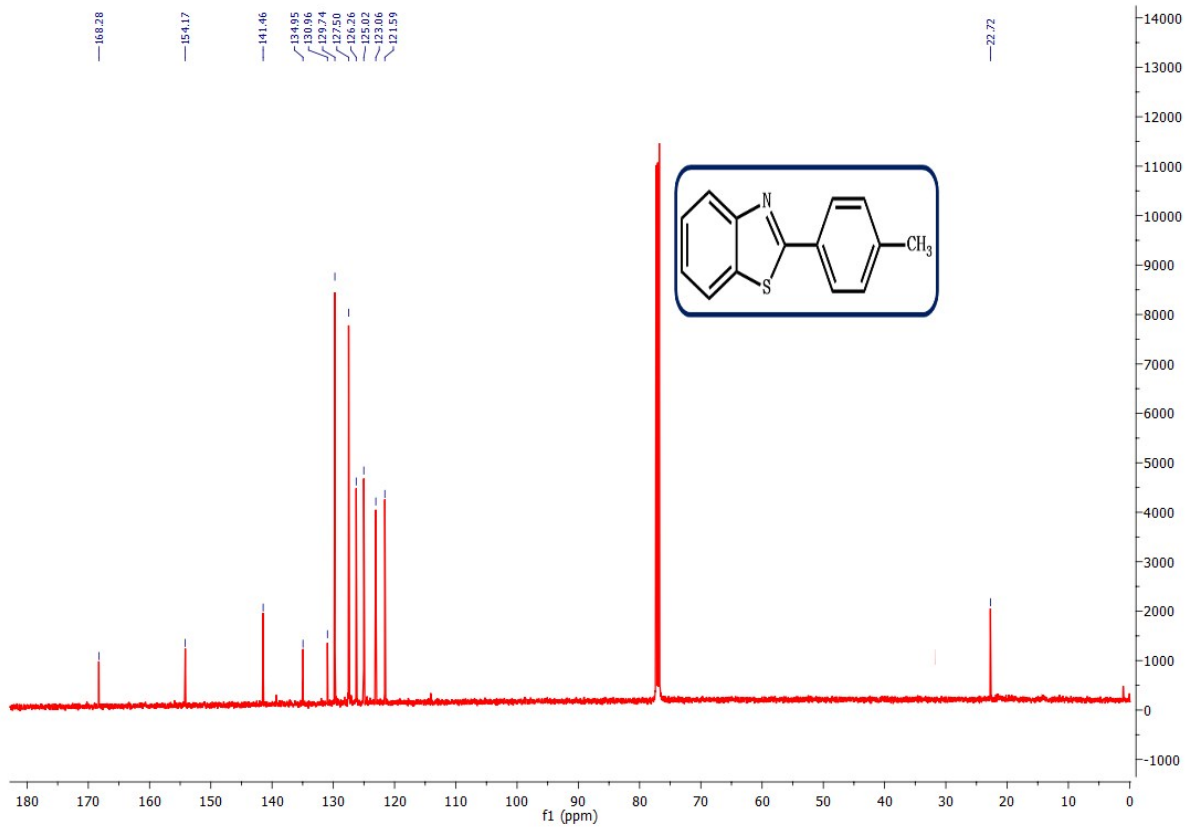

**5a. 4-(benzo[d]thiazol-2-yl)-N,N-dimethylaniline**

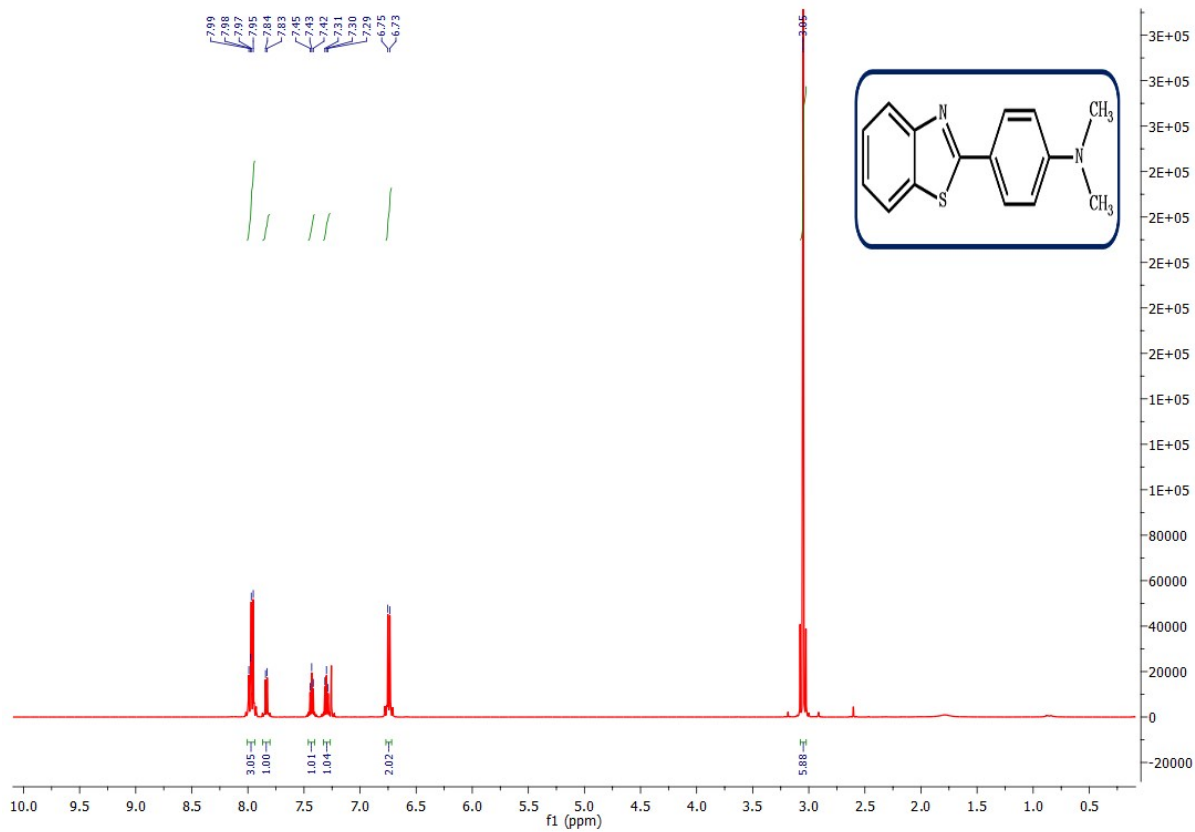



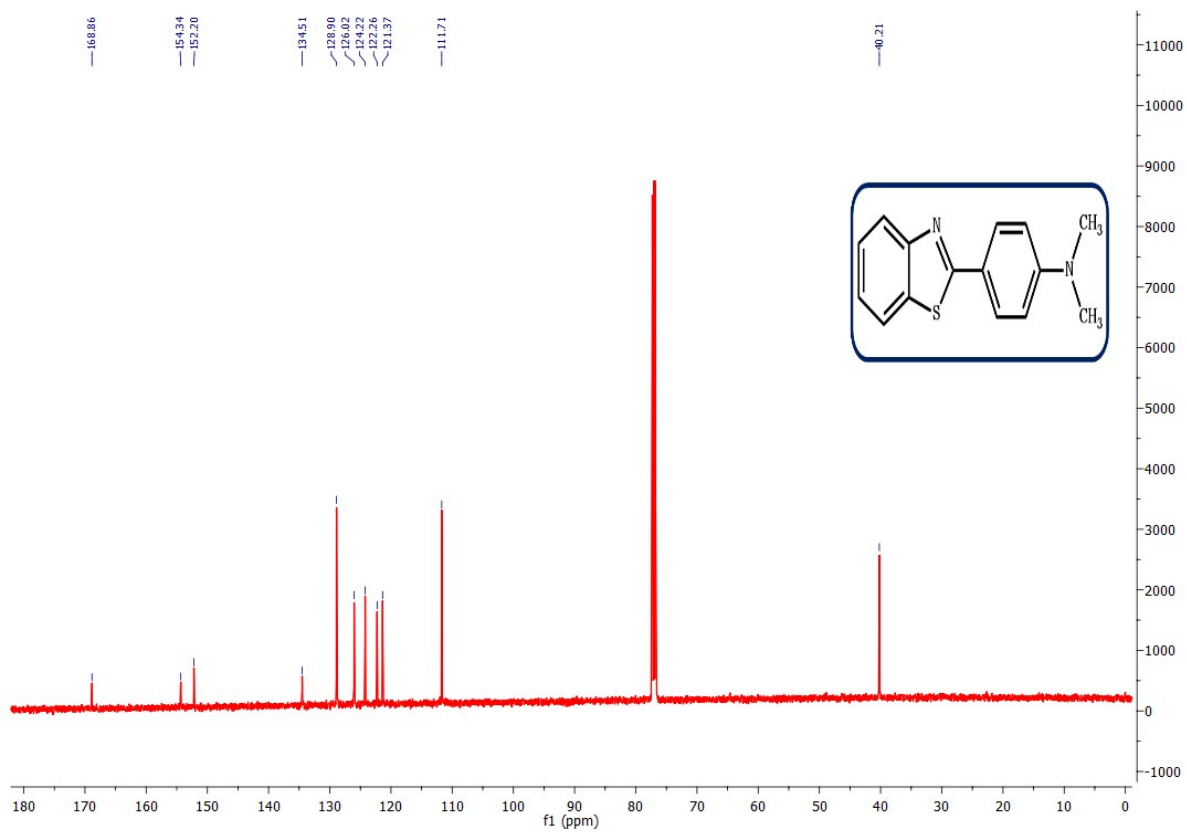

**6a. 2-(4-methoxyphenyl)benzo[d]thiazol**

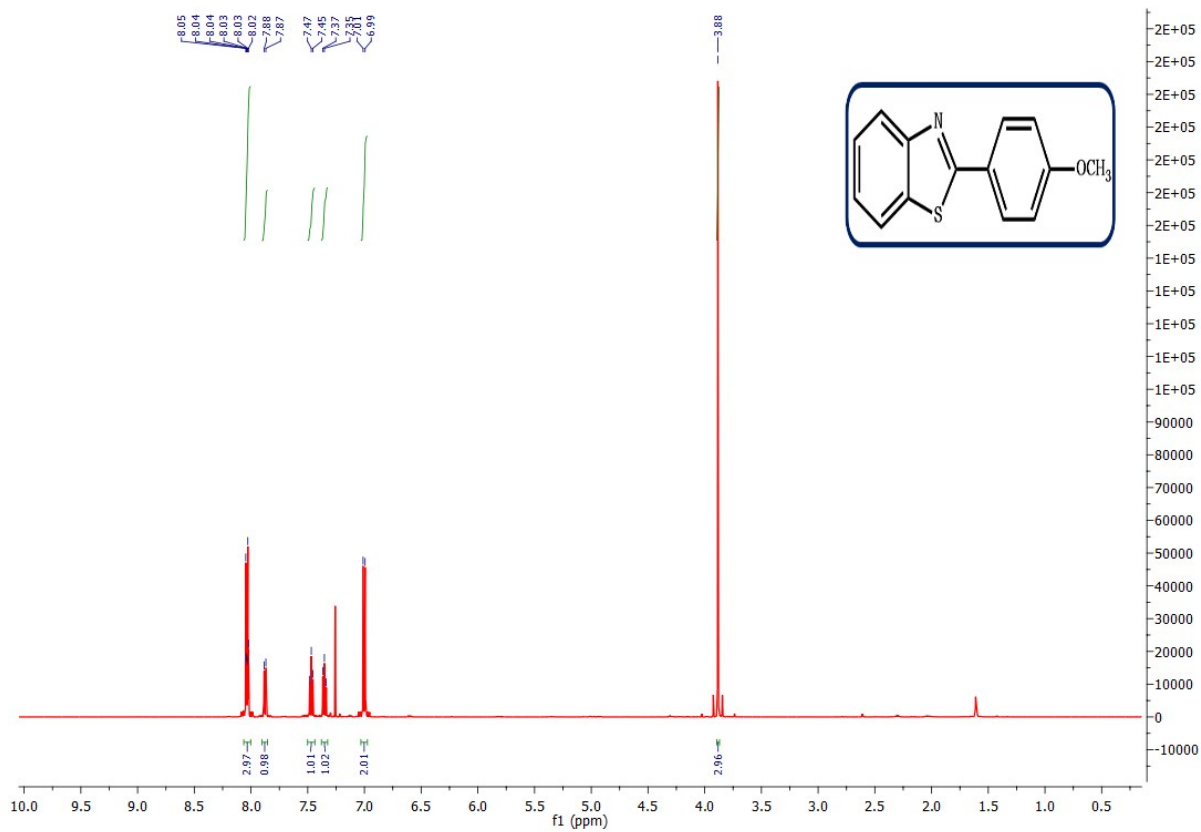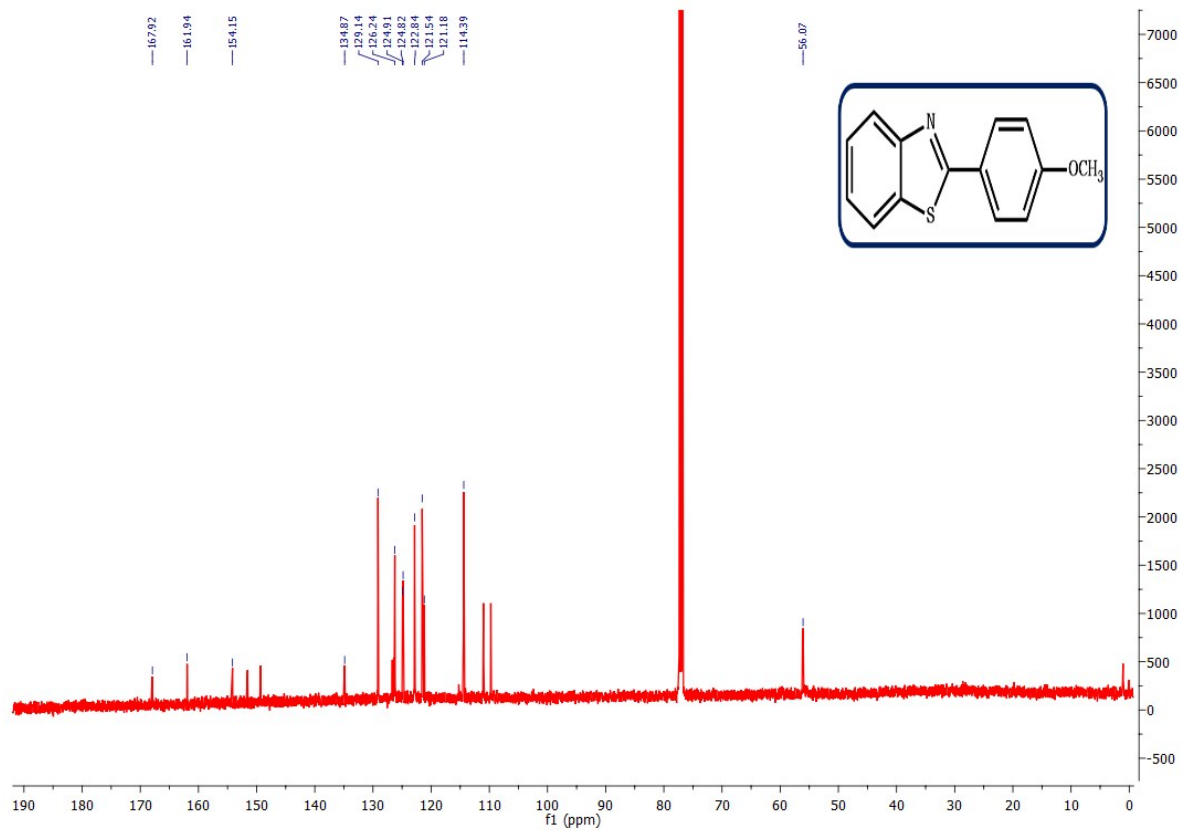

**7a. 2-(3,4-dimethoxyphenyl)benzo[d]thiazole**

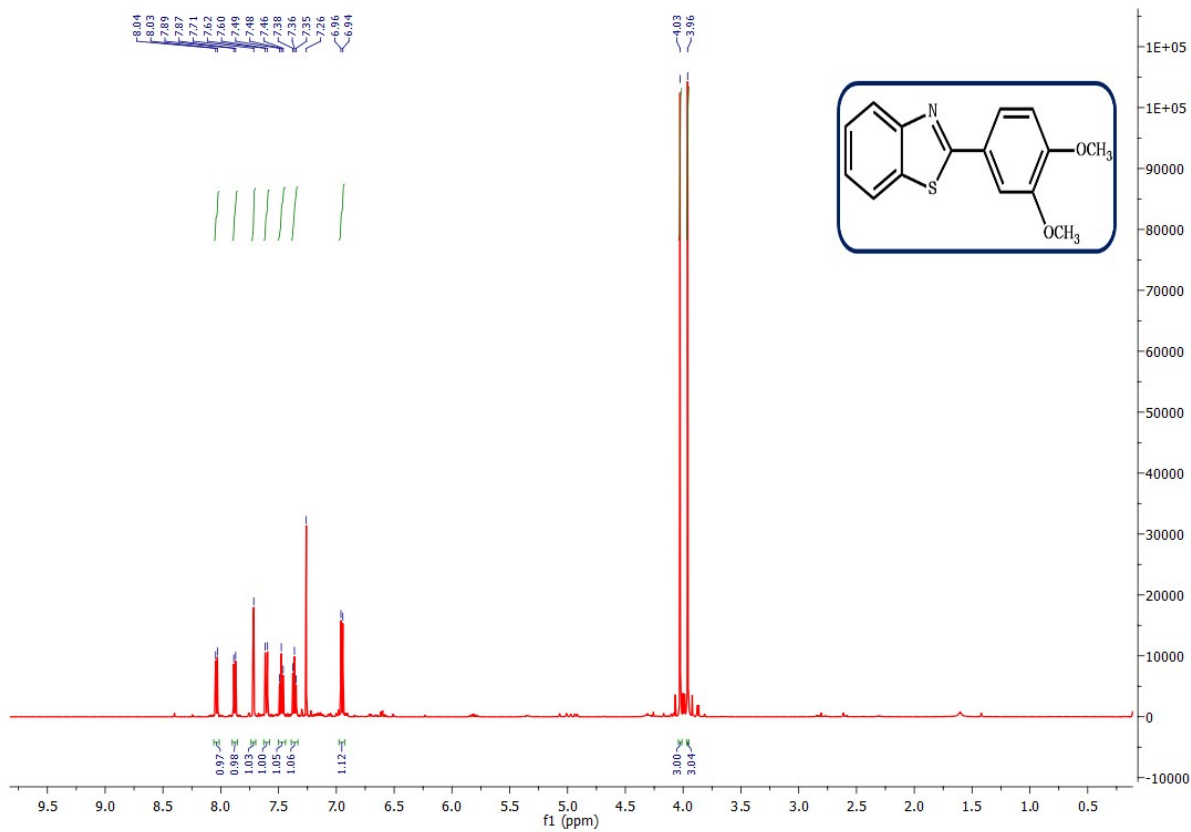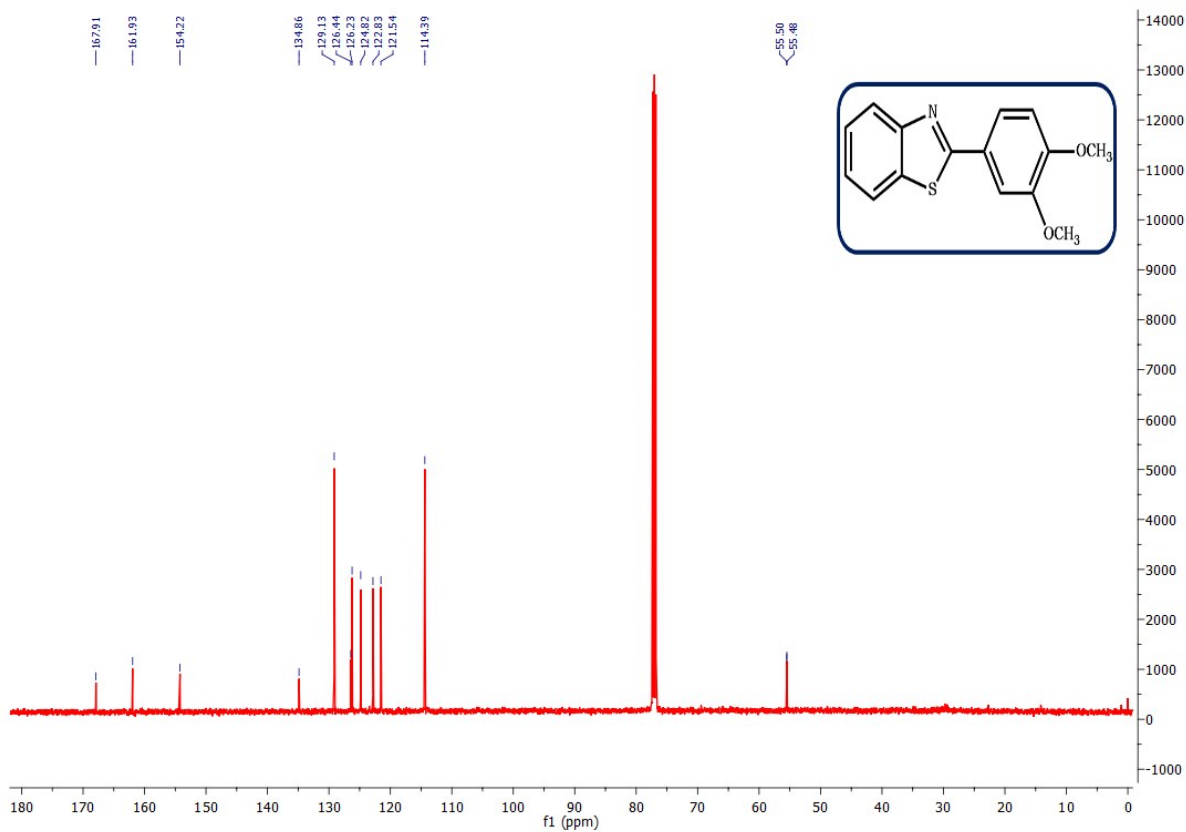

**8a. 2-(benzo[d]thiazol-2-yl)-5-methoxyphenol**

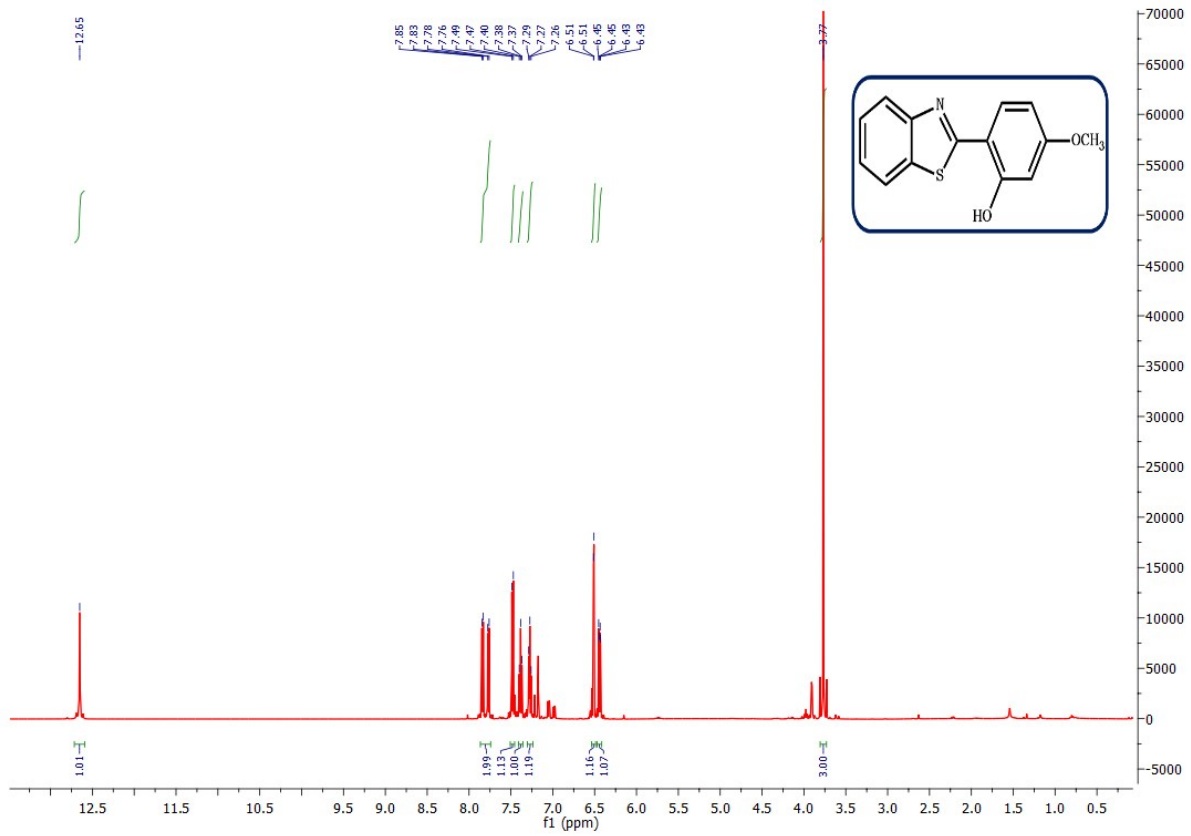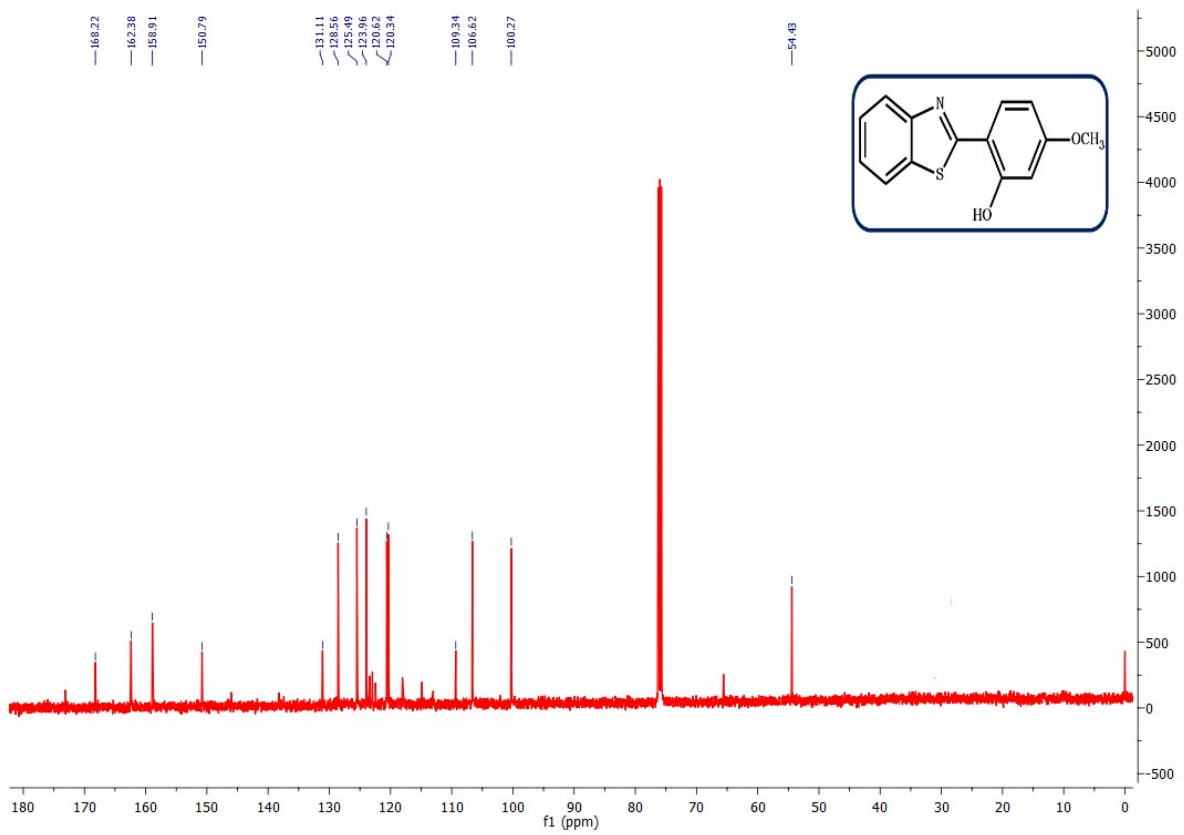

9a. 2-((1,1'-biphenyl)-4-yl)benzo[d]thiazole

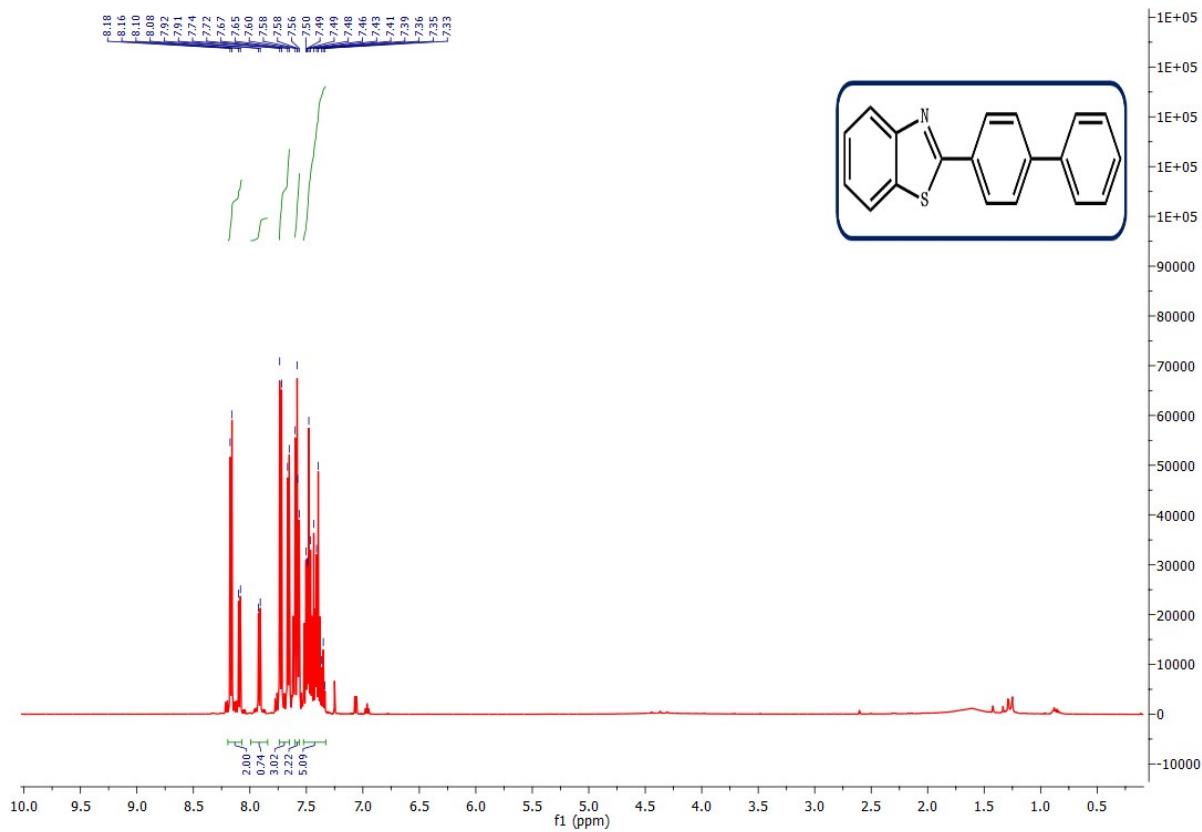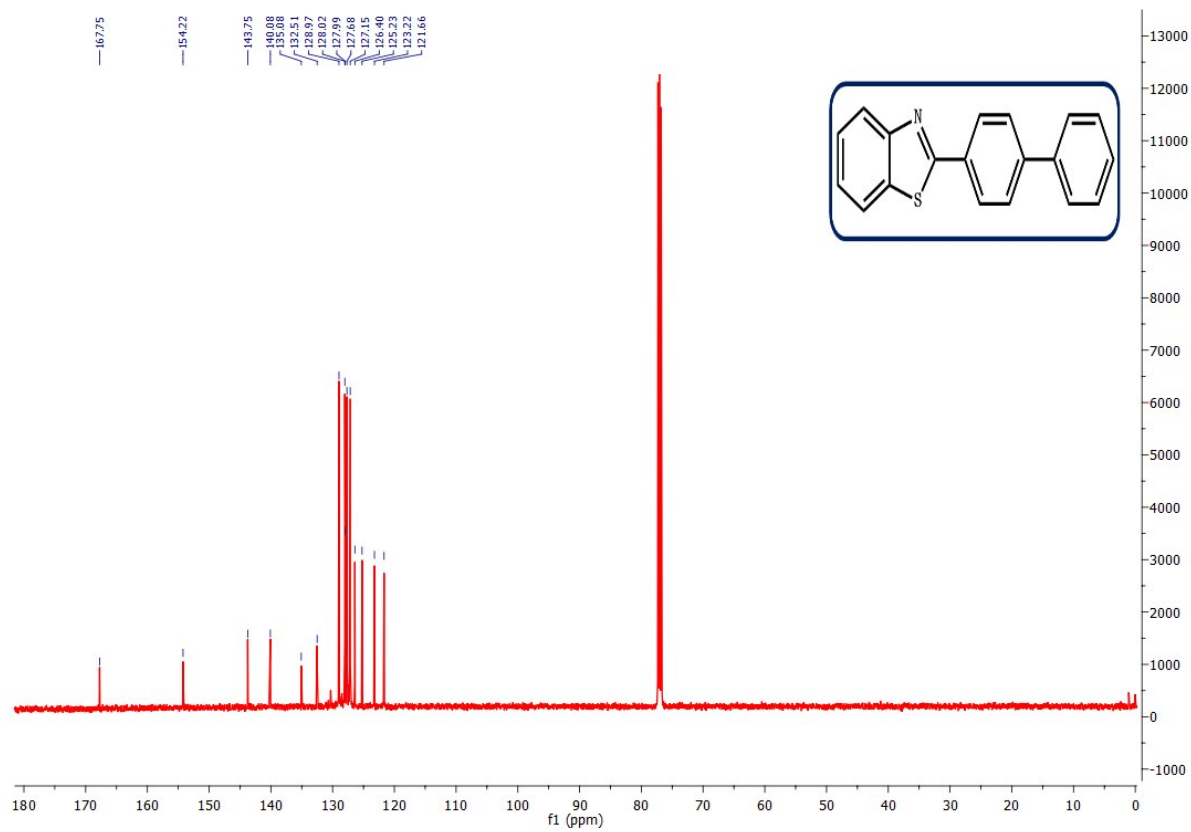

**10a. 2-Phenylbenzimidazole**

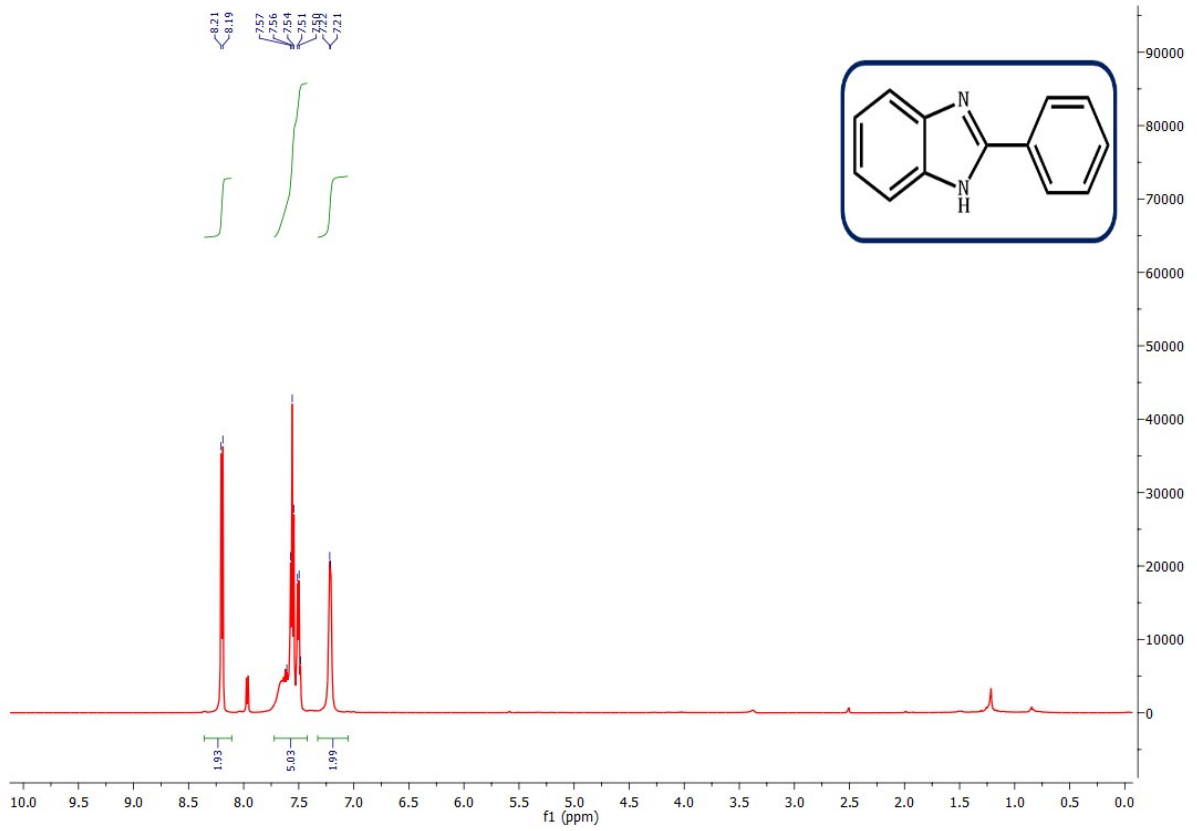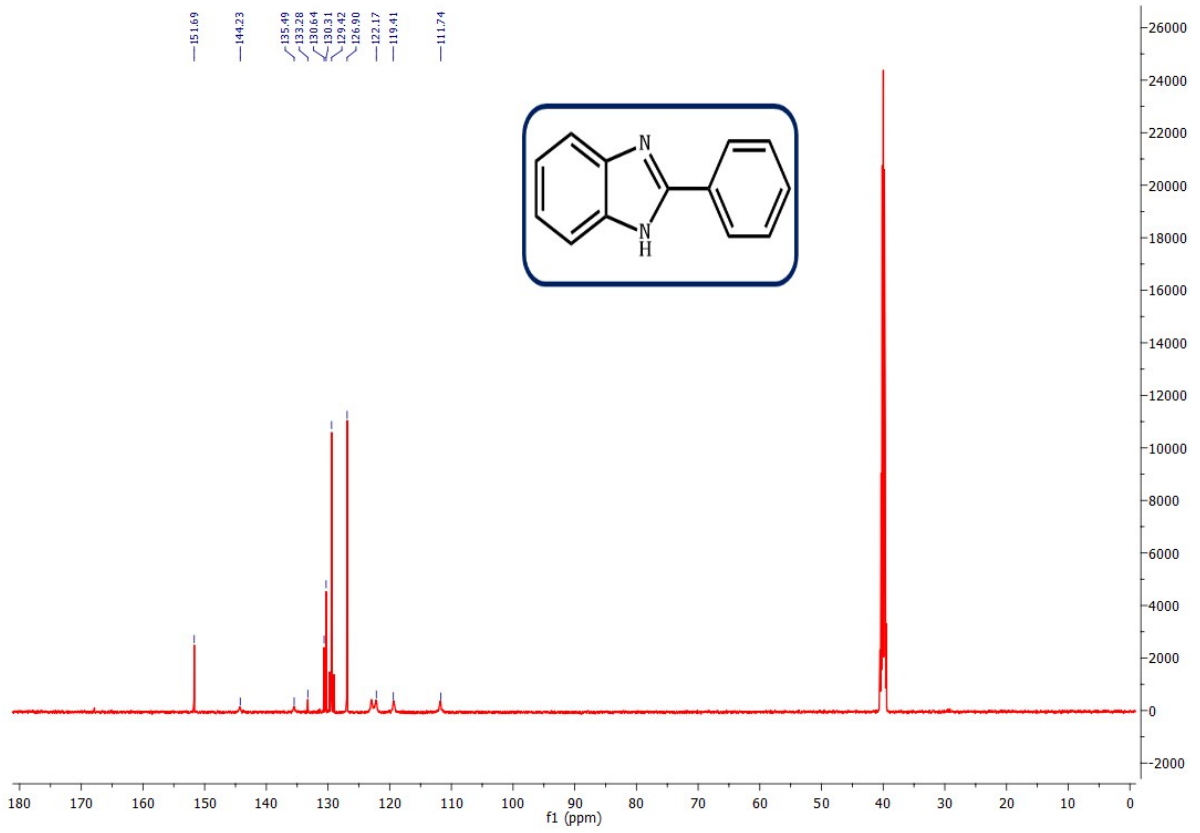

### <Spectrum>

R.Time:3.633(Scan#:220)  
MassPeaks:531 BasePeak:195(35797)  
Spectrum Mode:Averaged 3.349-4.182(202-252)  
BG Mode:Averaged 1.782-2.915(108-176) Polarity:Positive Segment 1 - Event 2

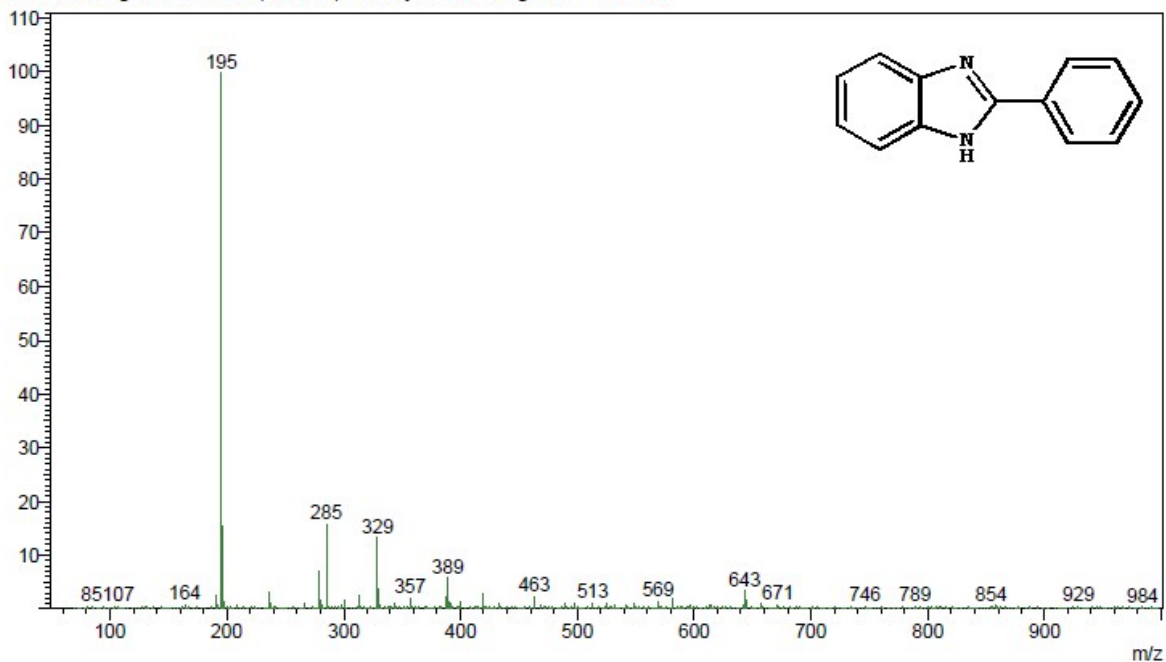

### 11a. 2-(2-bromophenyl)-1H-benzimidazole

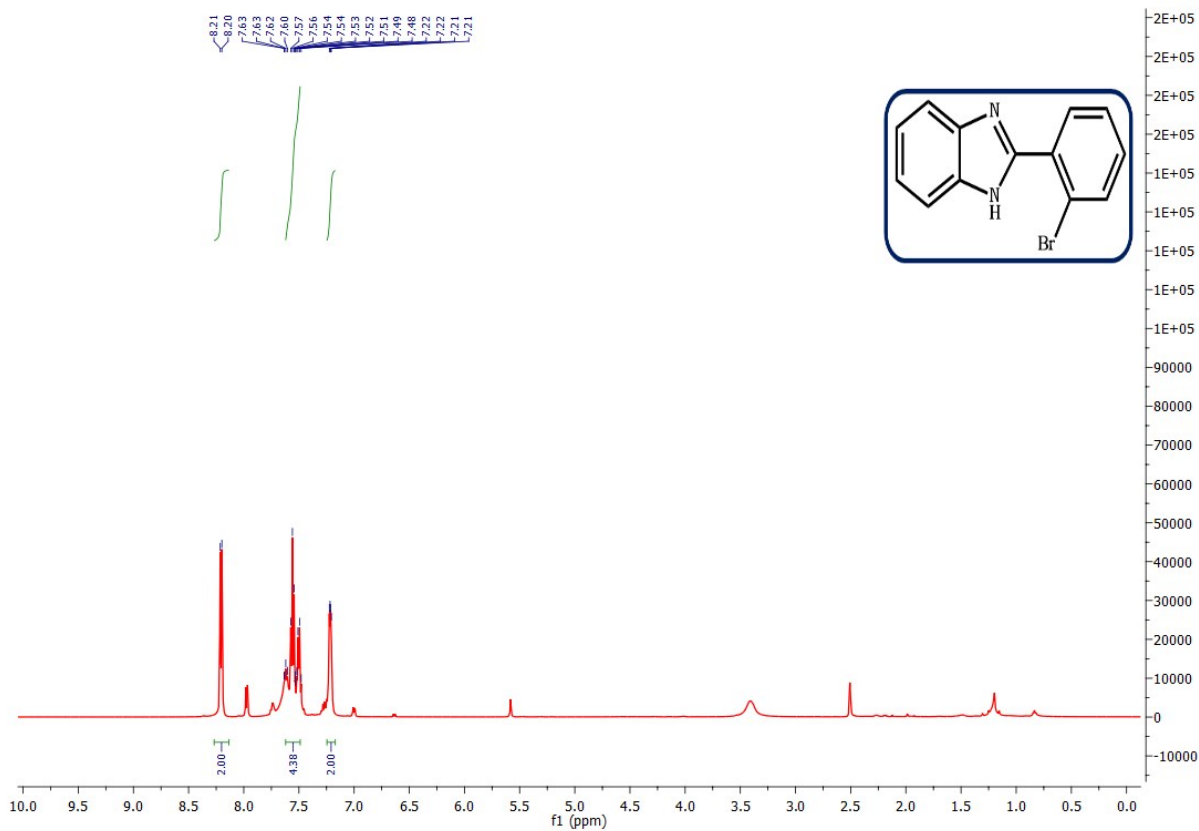

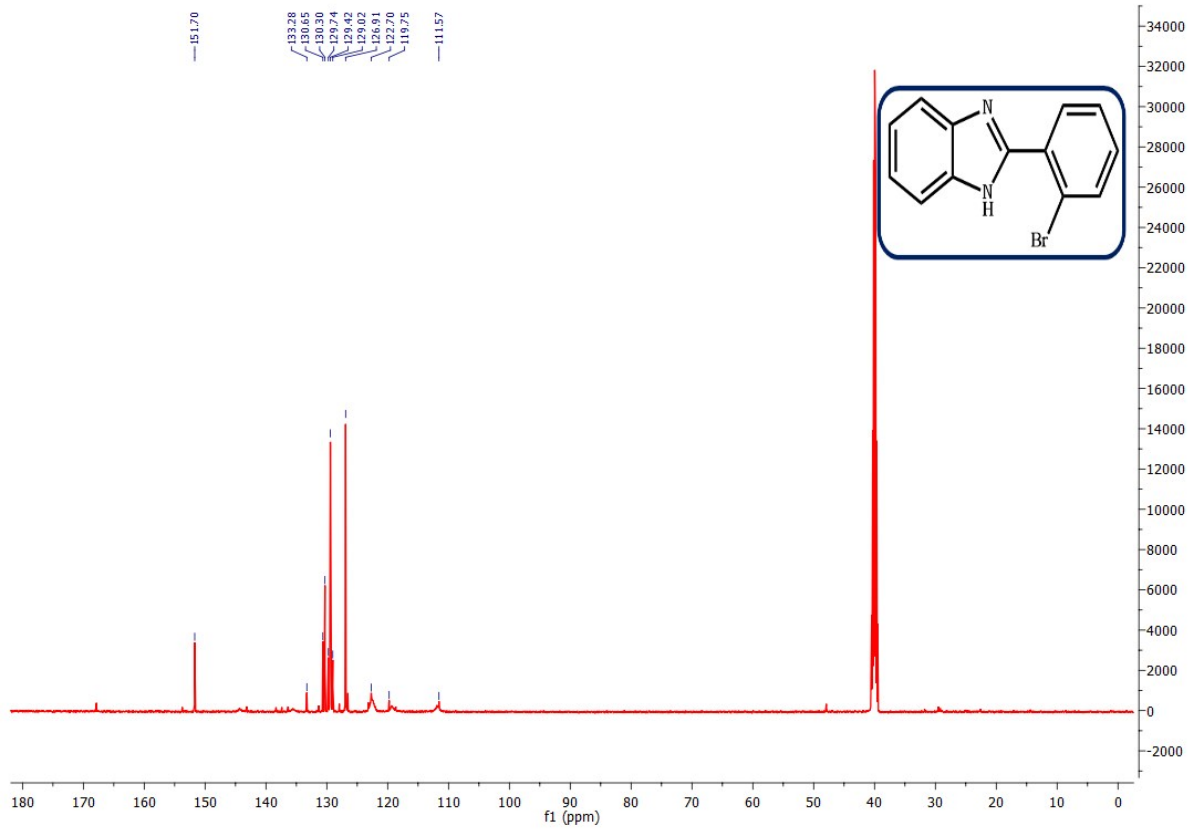

### 12a. 2-(4-chlorophenyl)-1H-benzo[d]imidazole

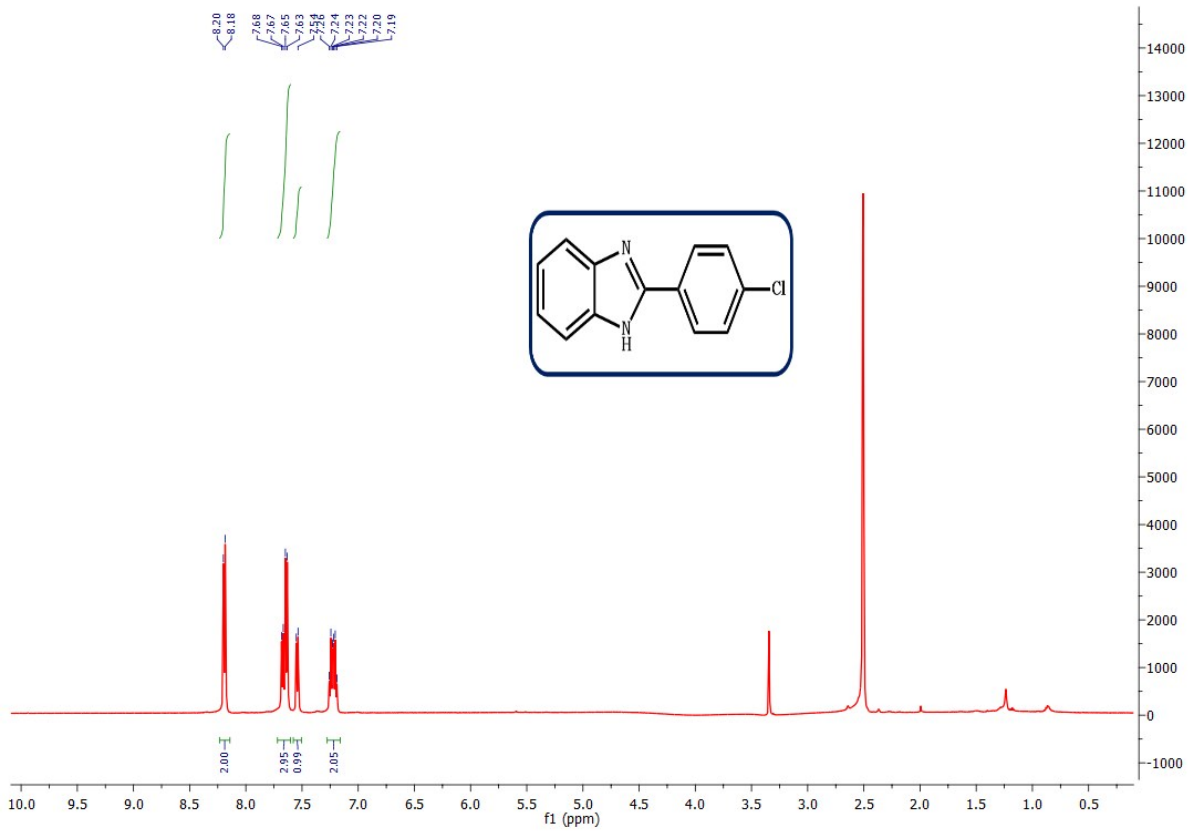



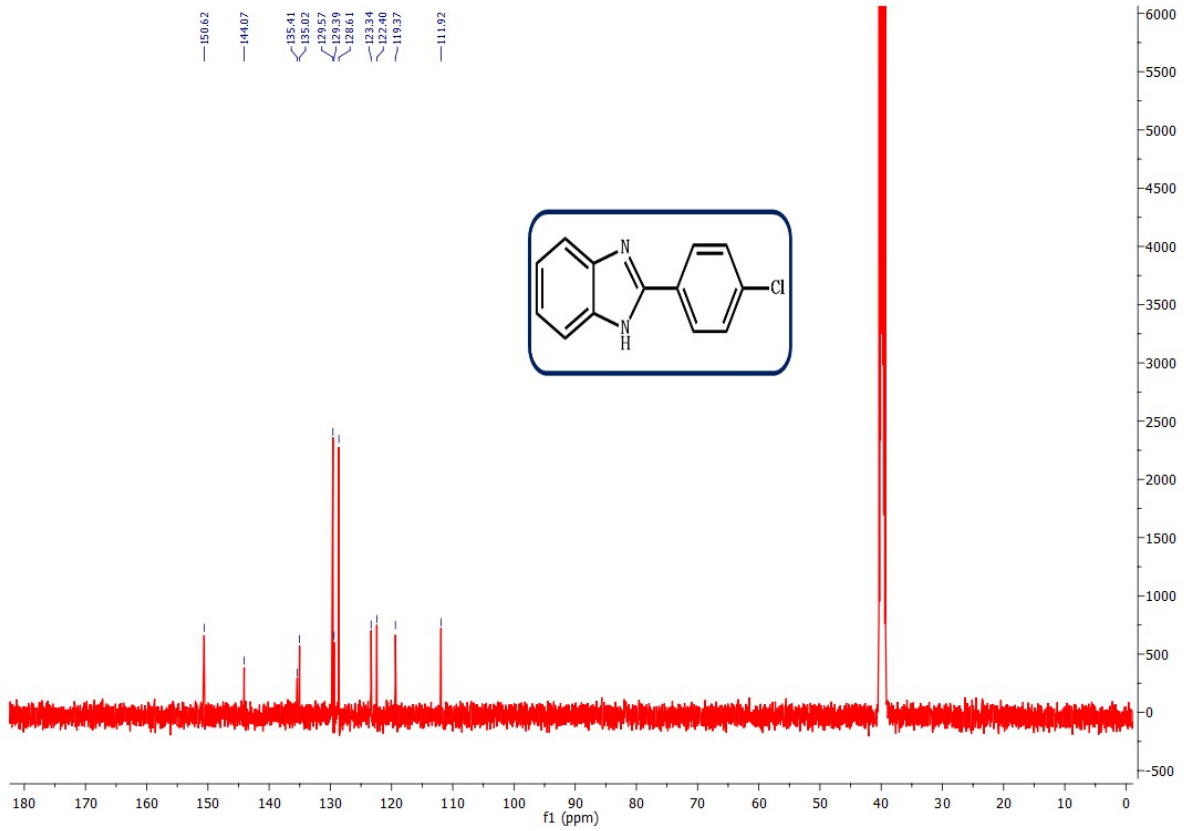

### 13a. 3-(1H-benzo[d]imidazol-2-yl)benzoic acid

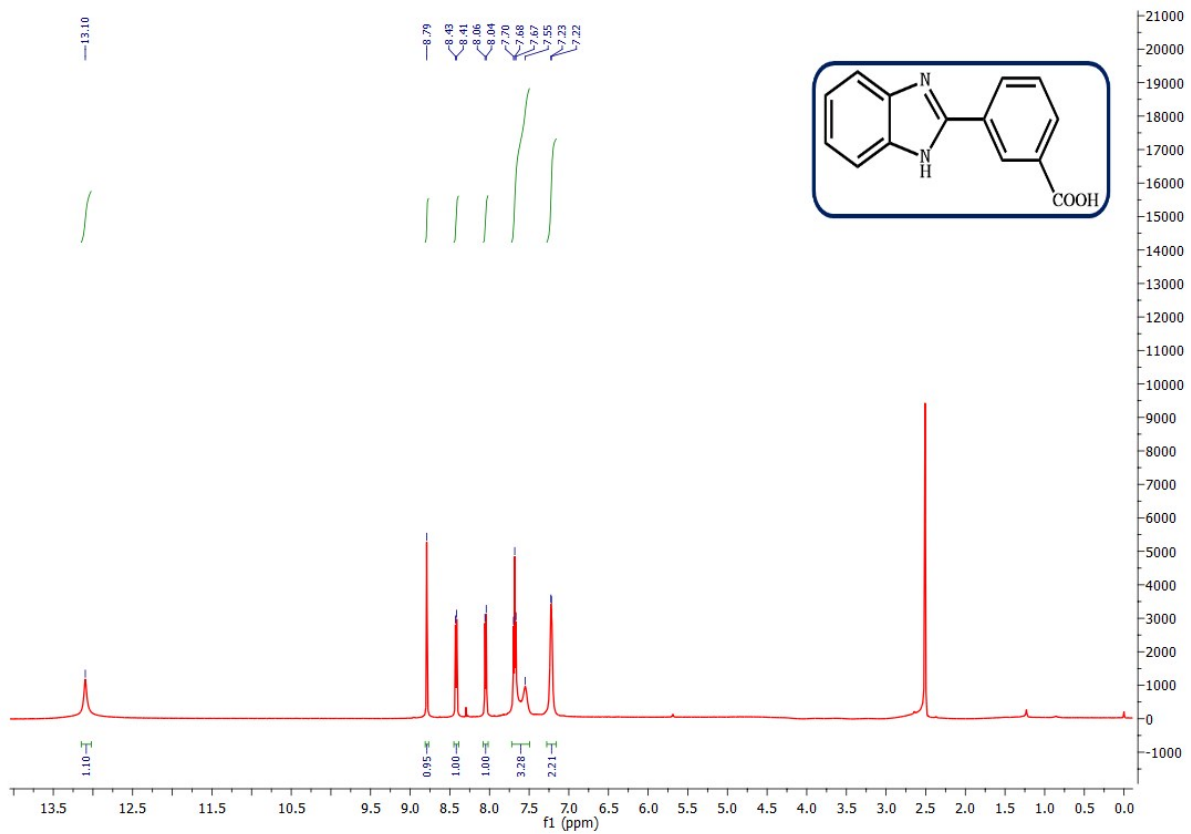

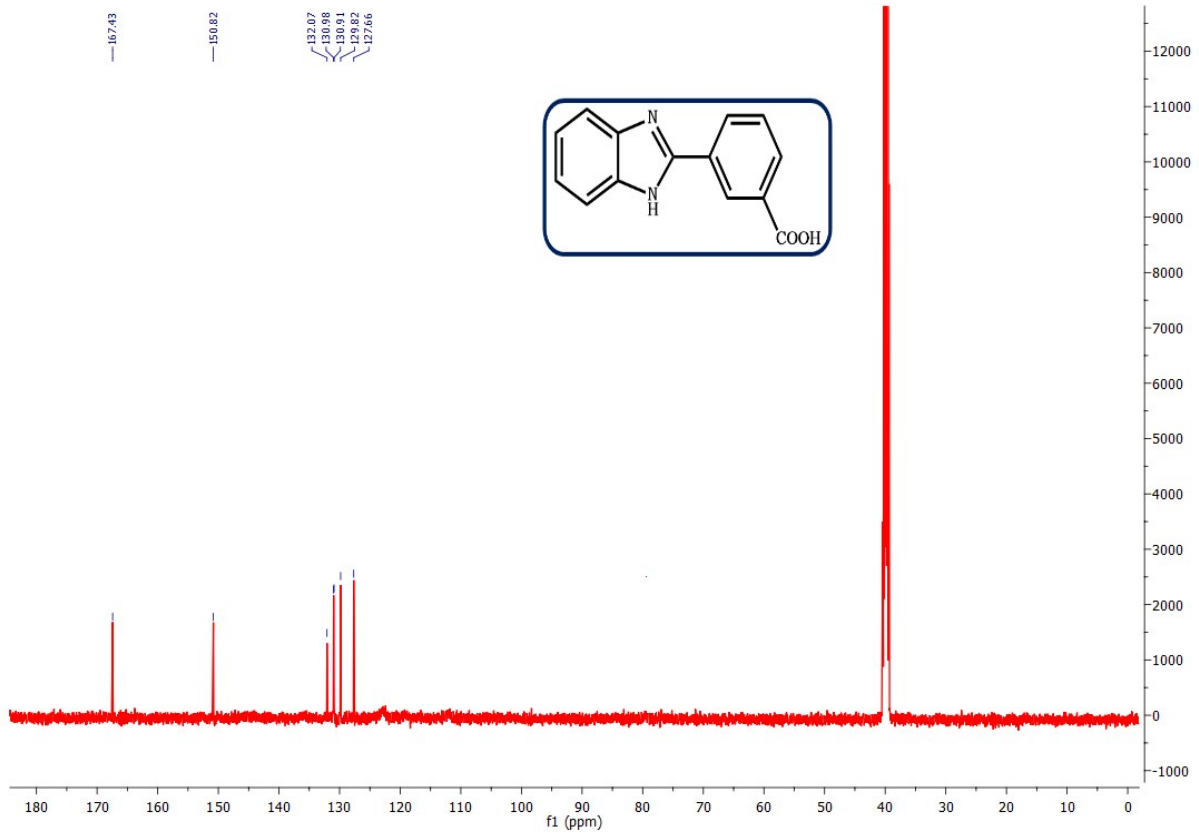

**14a. 2-(3,4-dimethoxyphenyl)-1H-benzimidazole**

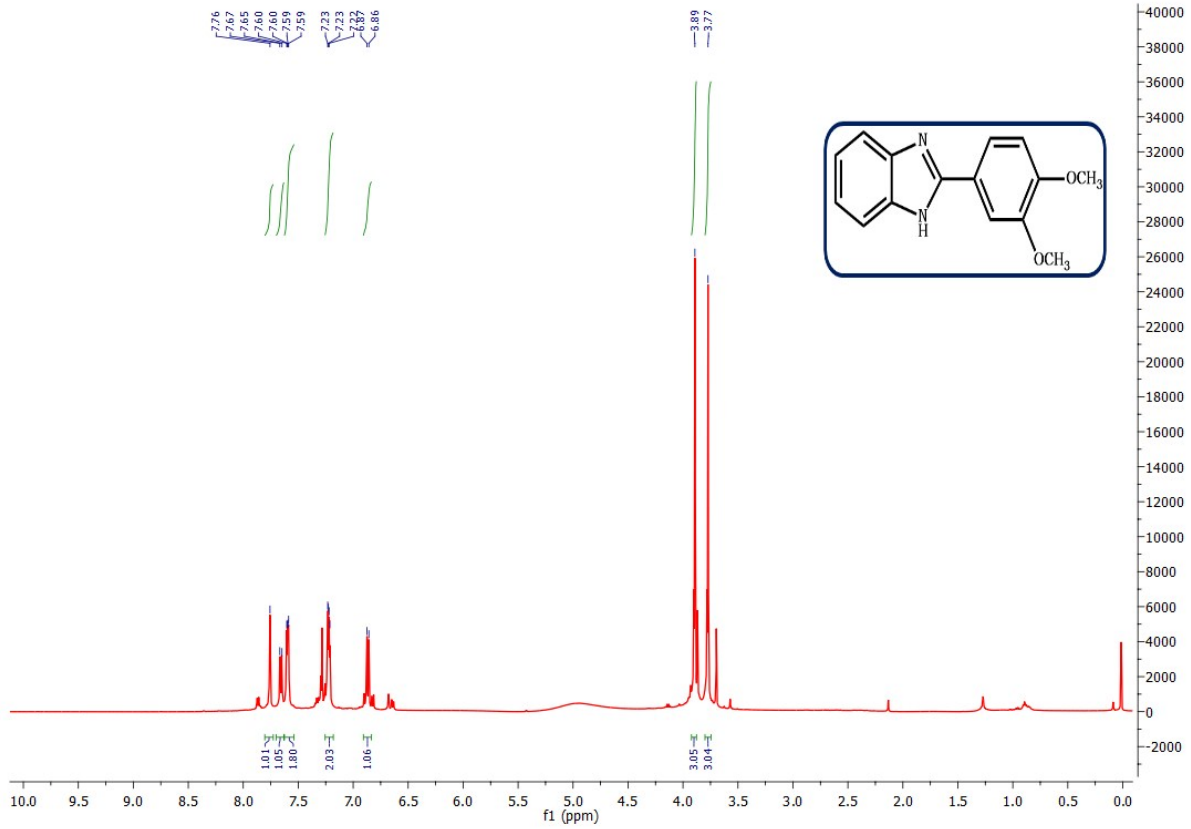

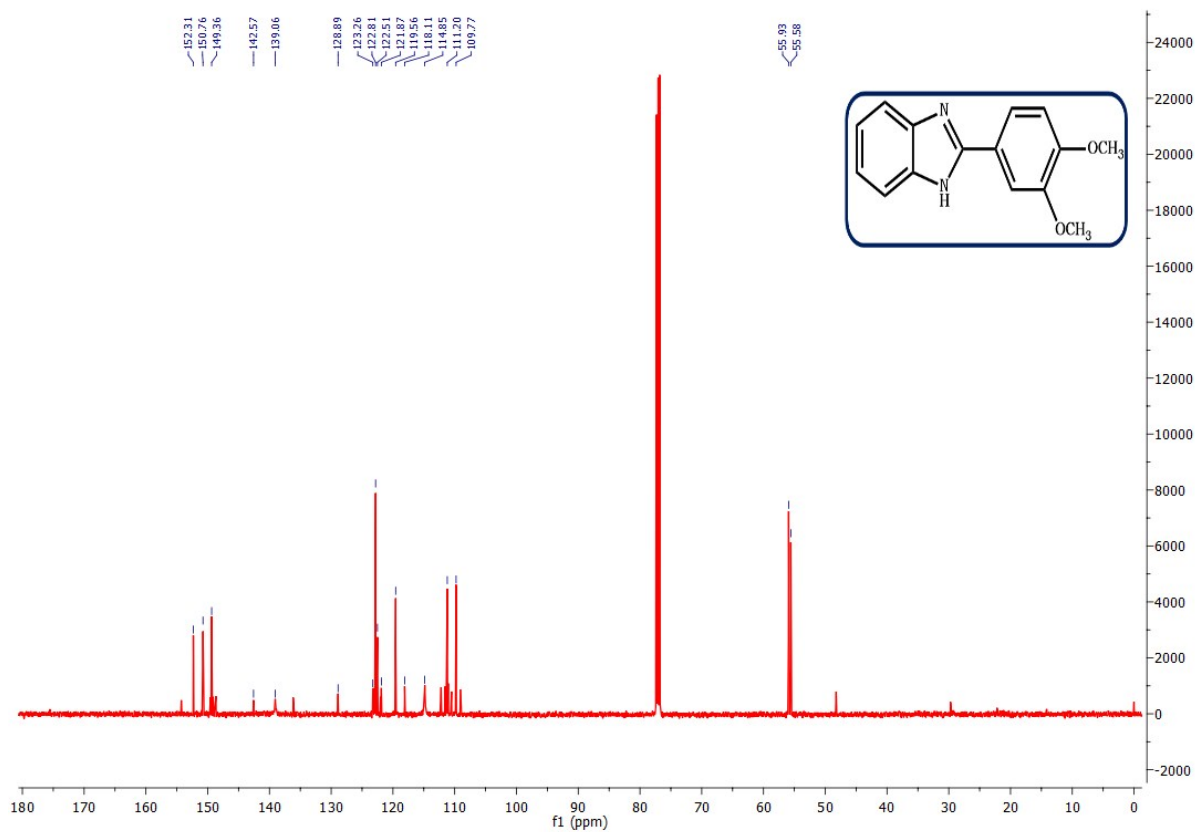

### 15a. 2-(p-tolyl)-1H-benzo[d]imidazole

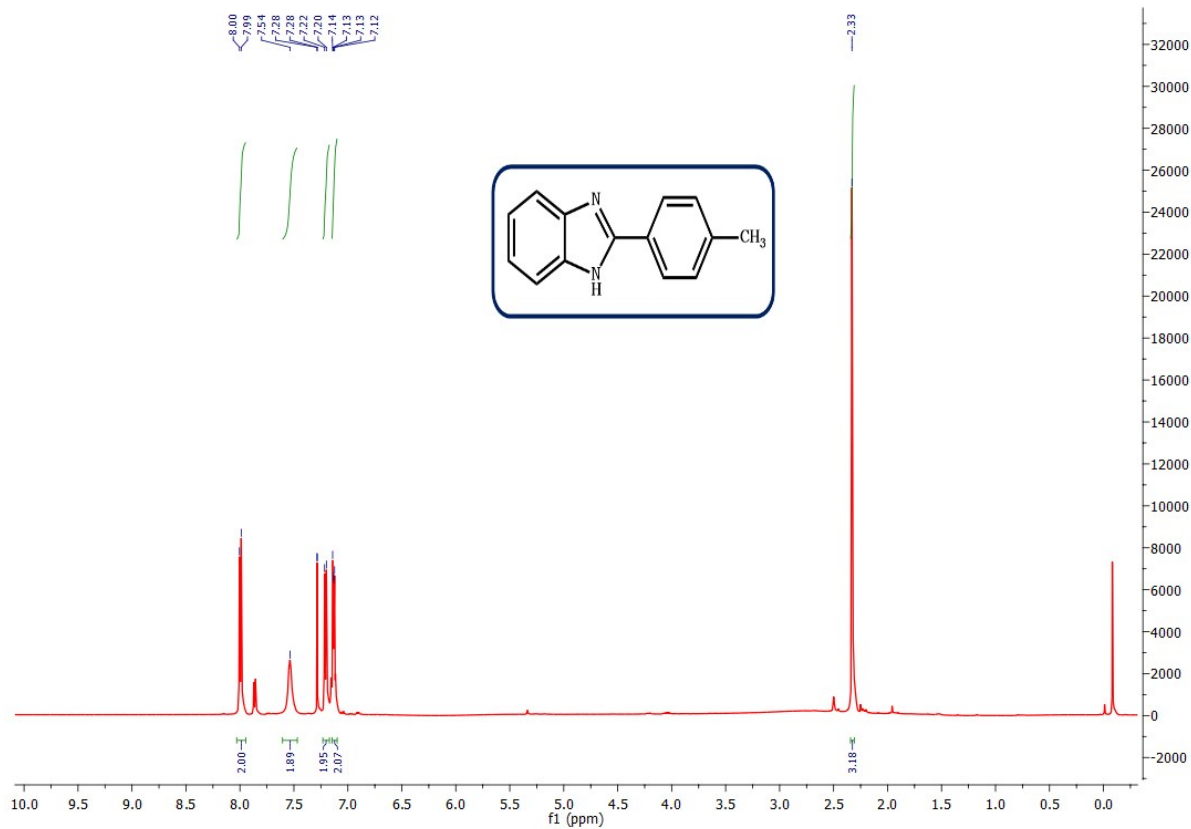

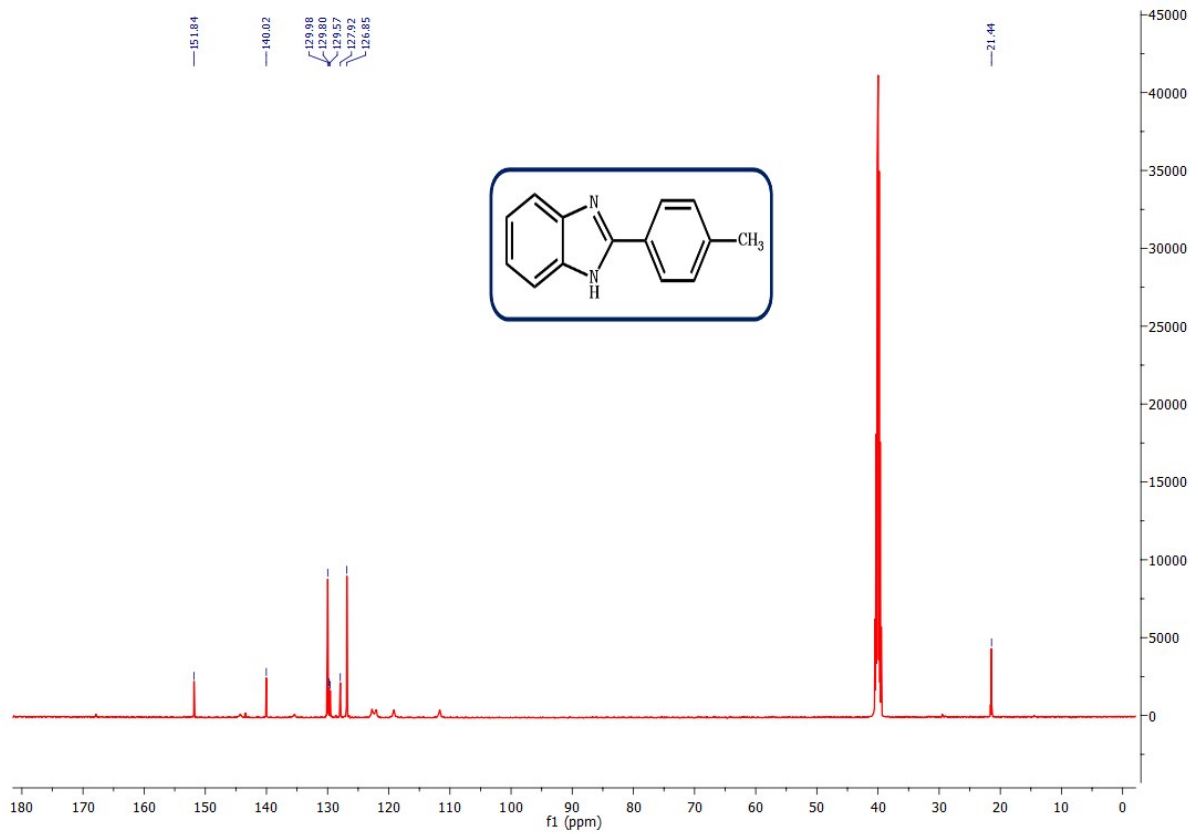

<Spectrum>

R. Time: 2.633 (Scan#: 160)  
 Mass Peaks: 465 Base Peak: 209 (35629)  
 Spectrum Mode: Averaged 2.449-3.215 (148-194)  
 BG Mode: Averaged 1.315-1.982 (80-120) Polarity: Positive Segment 1 - Event 2

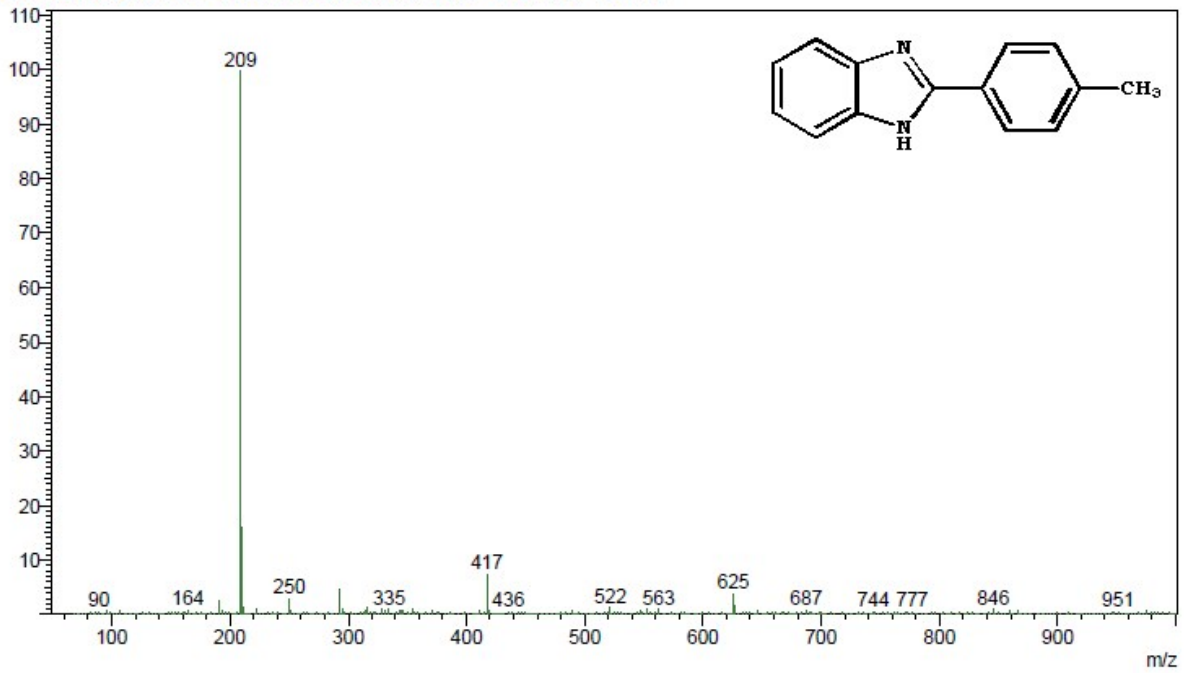

# 16a. 4-(1H-benzo[d]imidazole-2-yl)-N,N-dimethylaniline

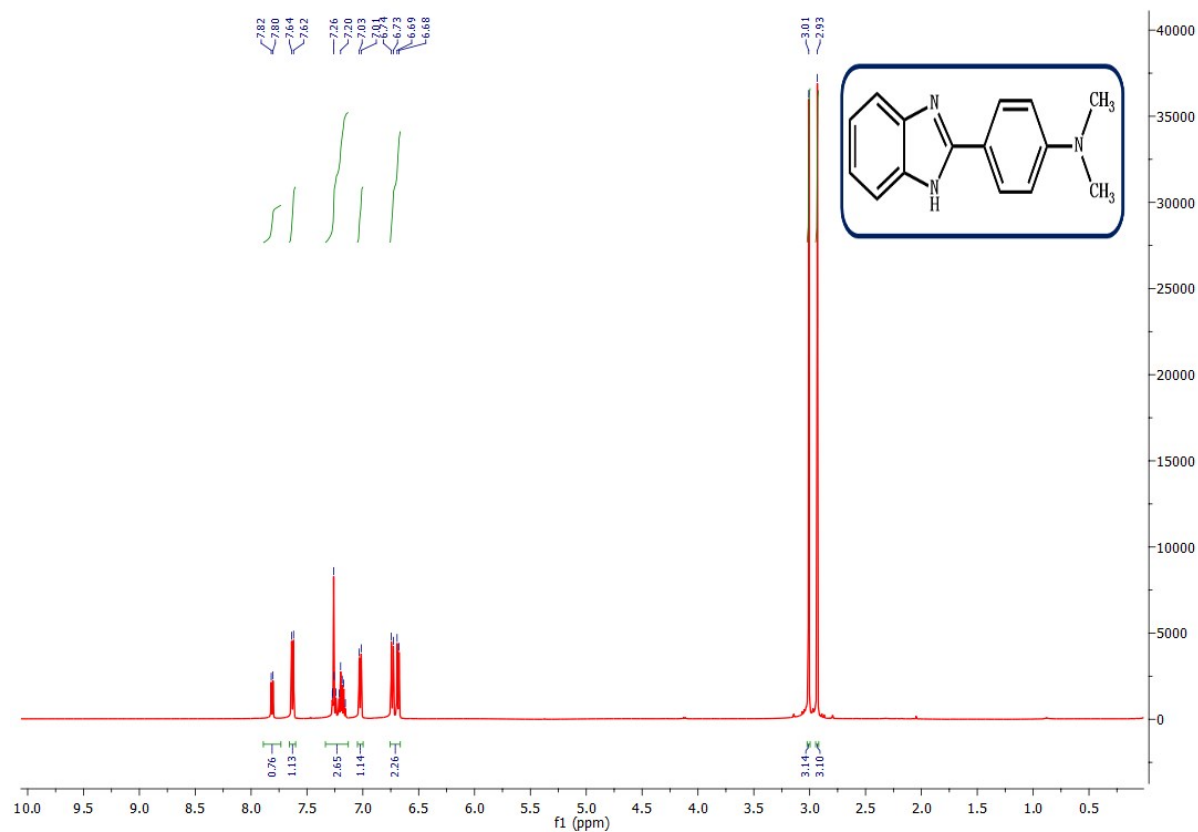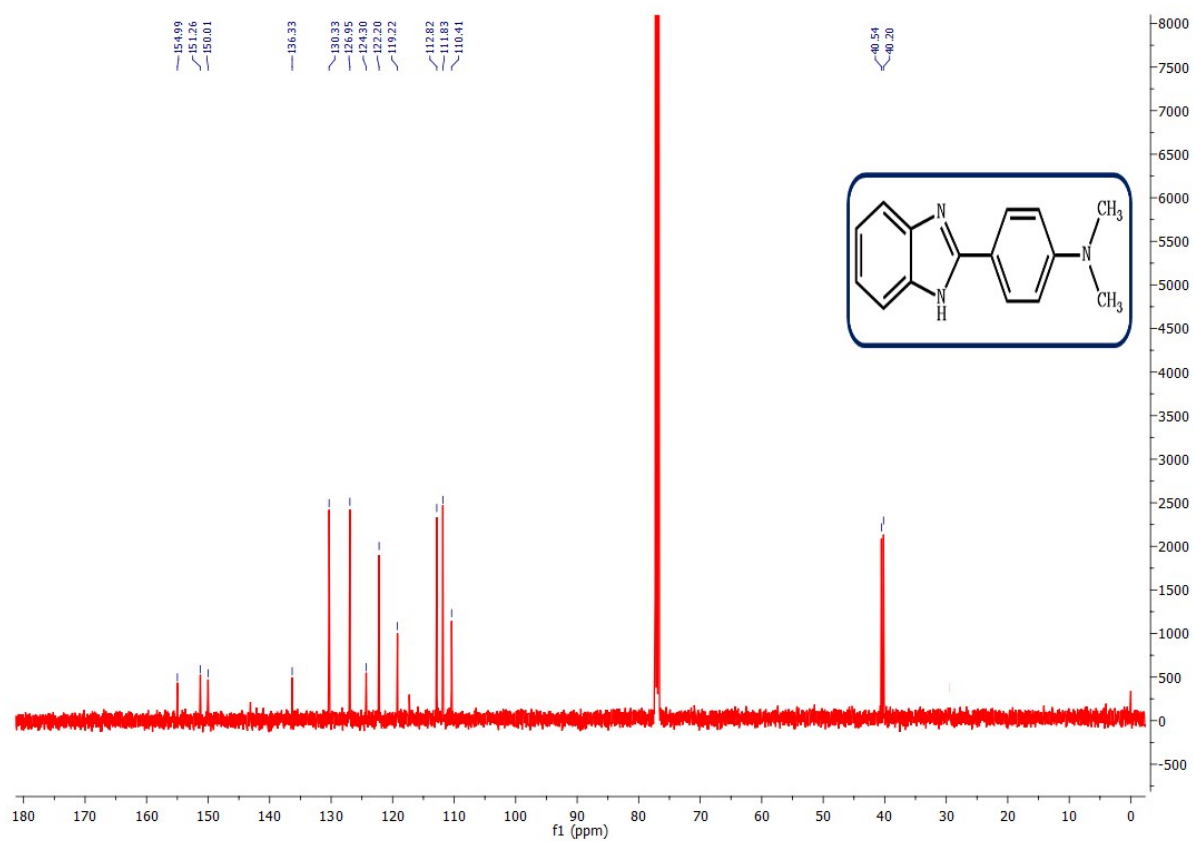

# 17a. 2-([1,1'-biphenyl]-4-yl)-1H-benzo[d]imidazole

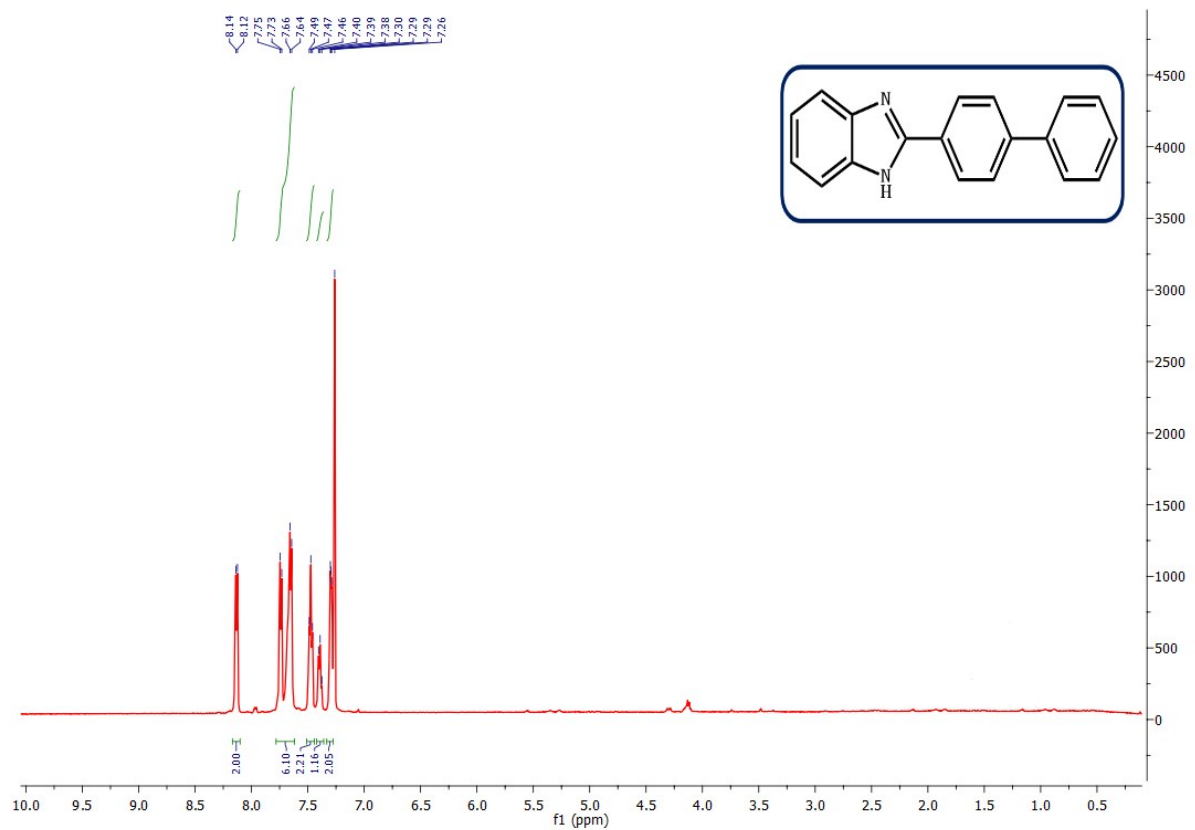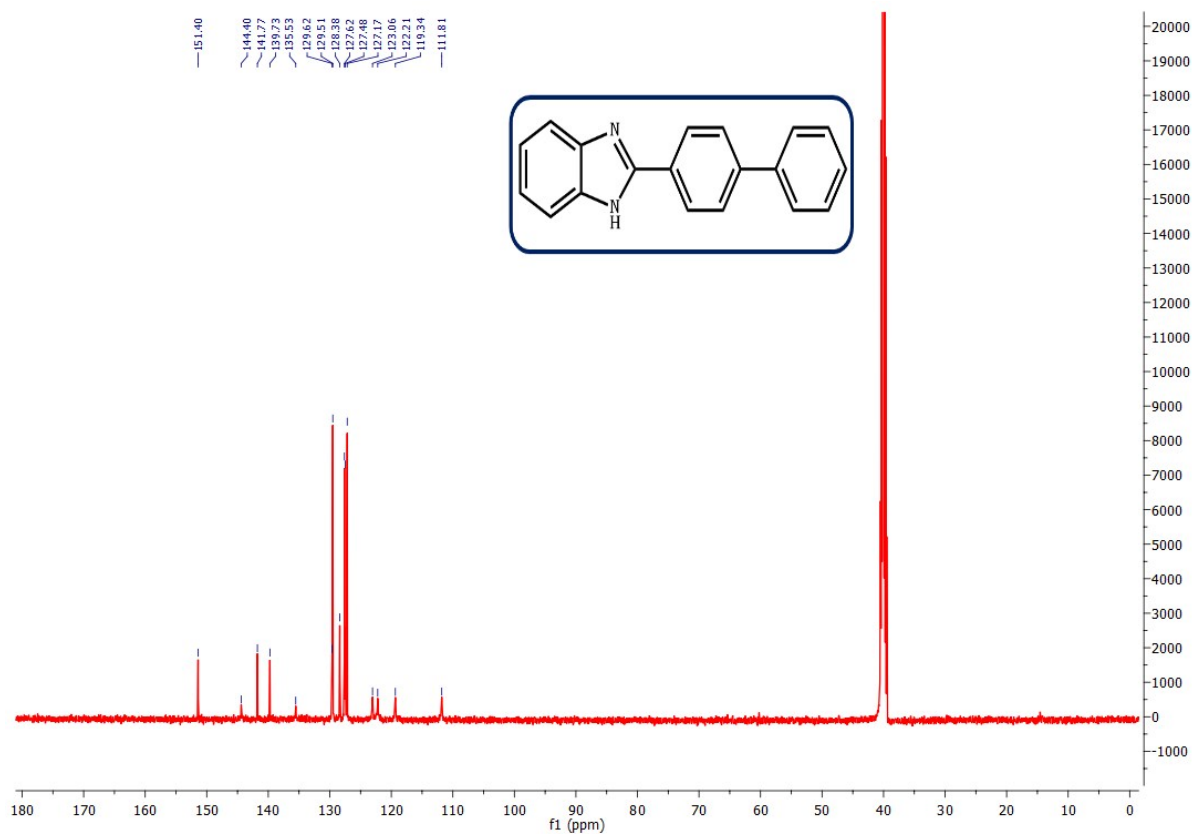

### <Spectrum>

R.Time:2.900(Scan#:176)  
MassPeaks:498 BasePeak:271(21273)  
Spectrum Mode:Averaged 2.249-3.215(136-194)  
BG Mode:Averaged 1.449-1.915(88-116) Polarity:Positive Segment 1 - Event 2

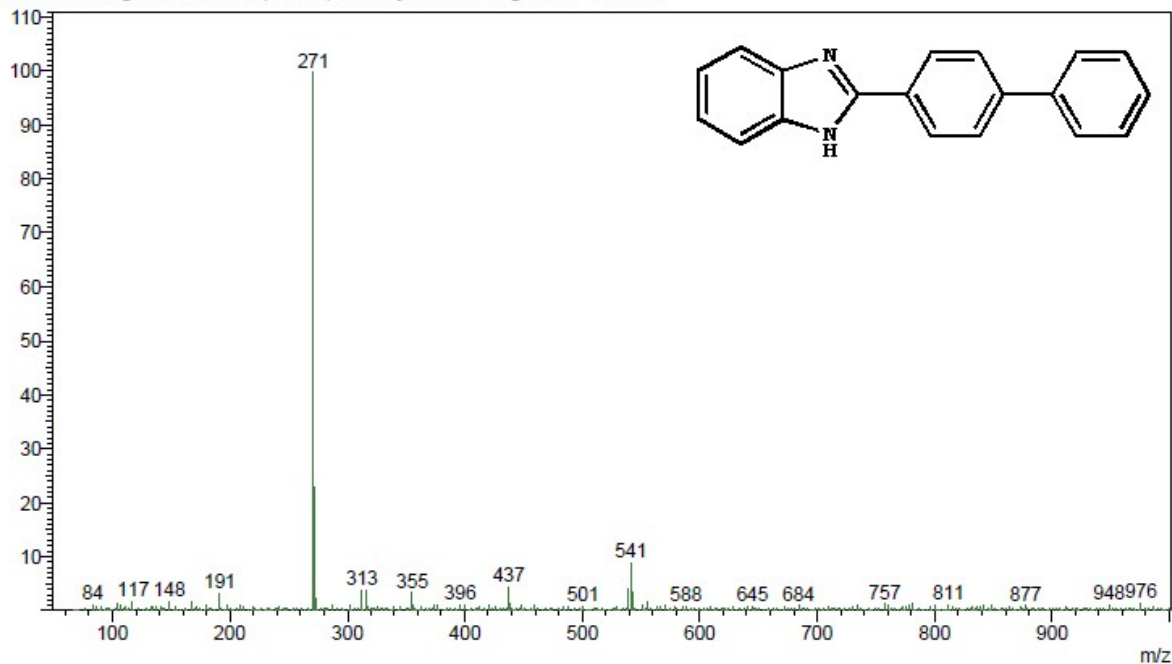

### 18a. 2-butyl-1H-benzo[d]imidazole

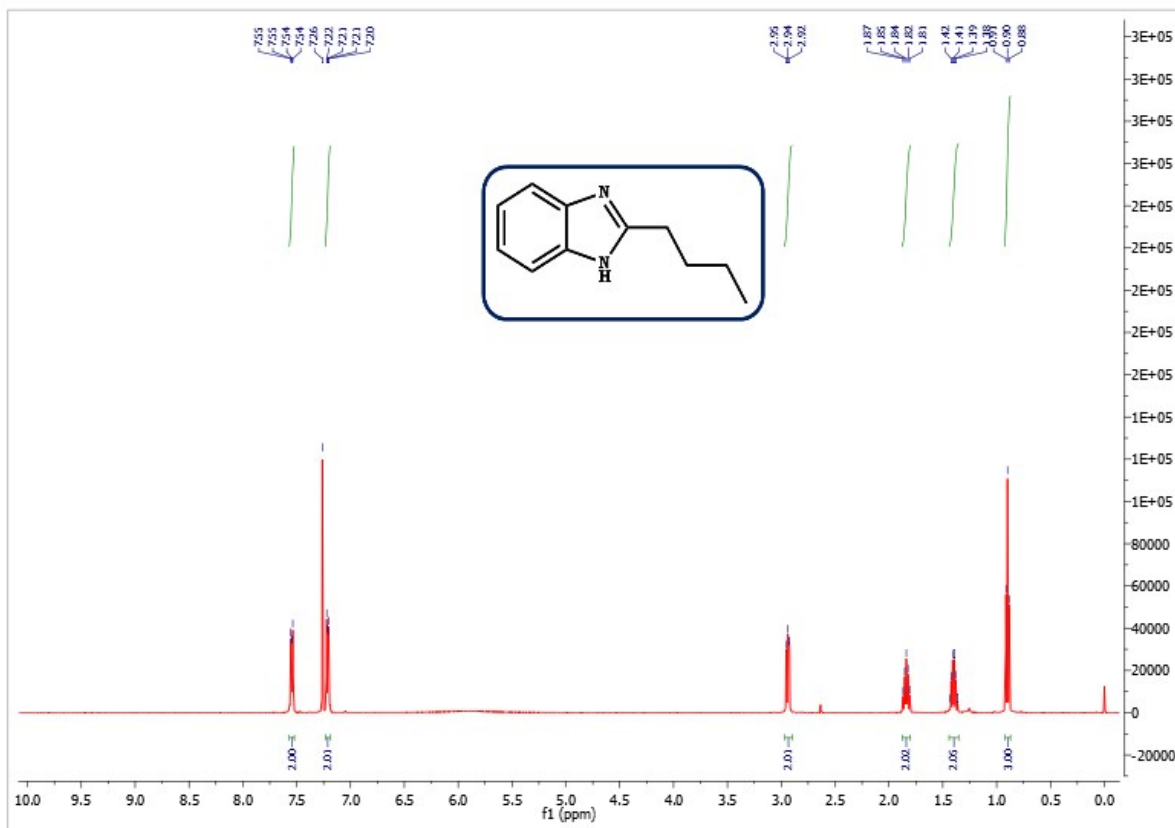

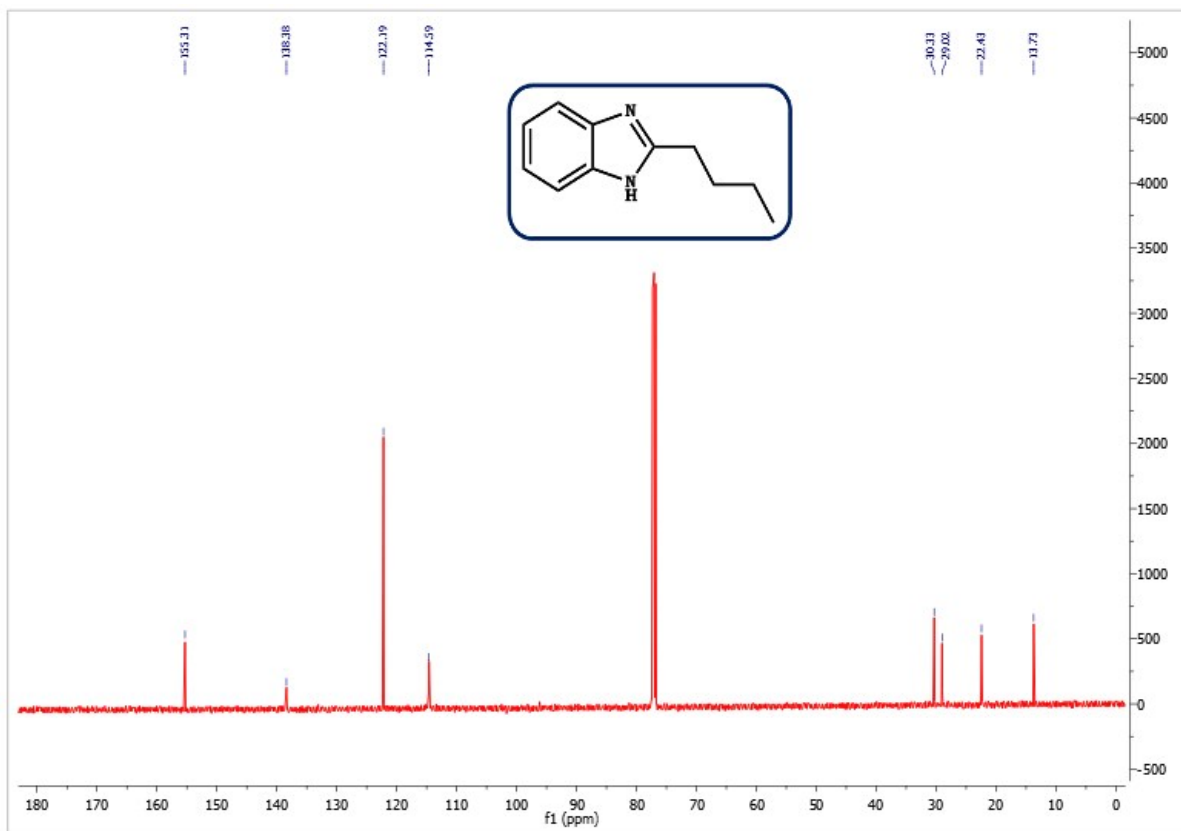

19a. 2-ethyl-1H-benzo[d]imidazole

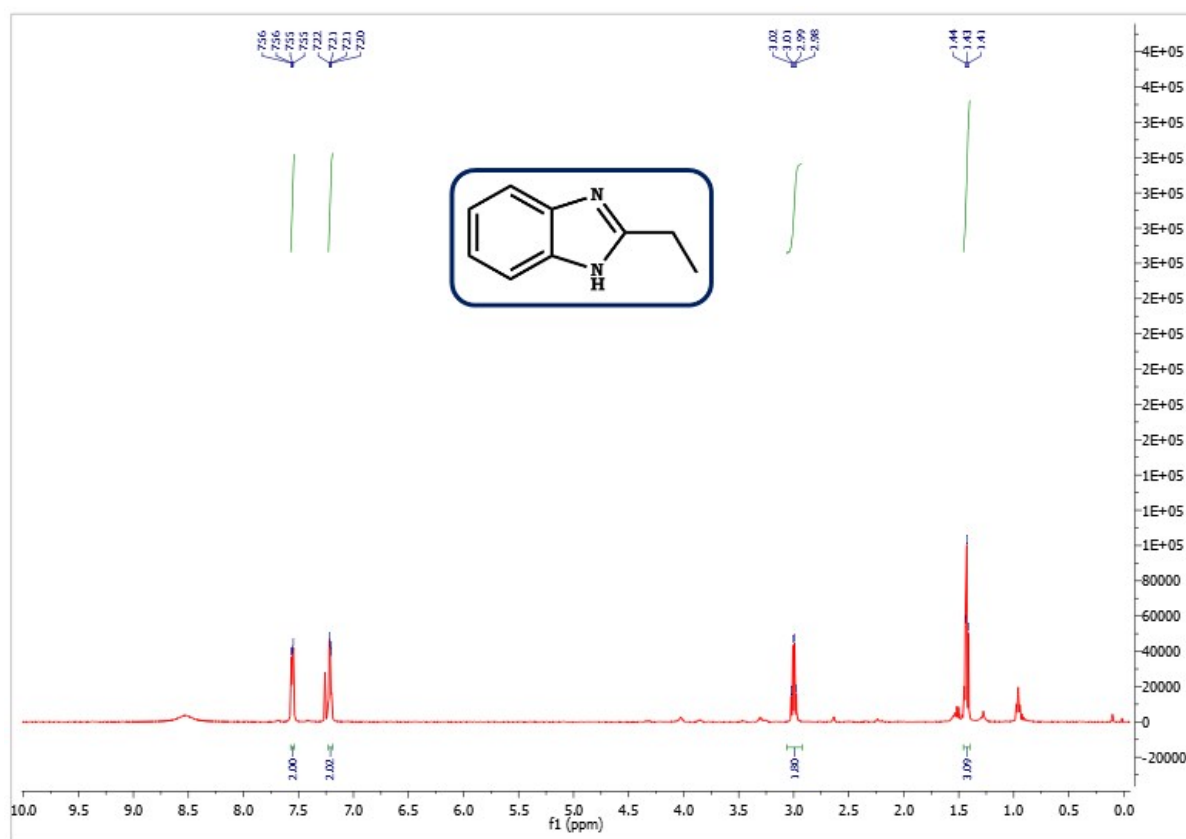



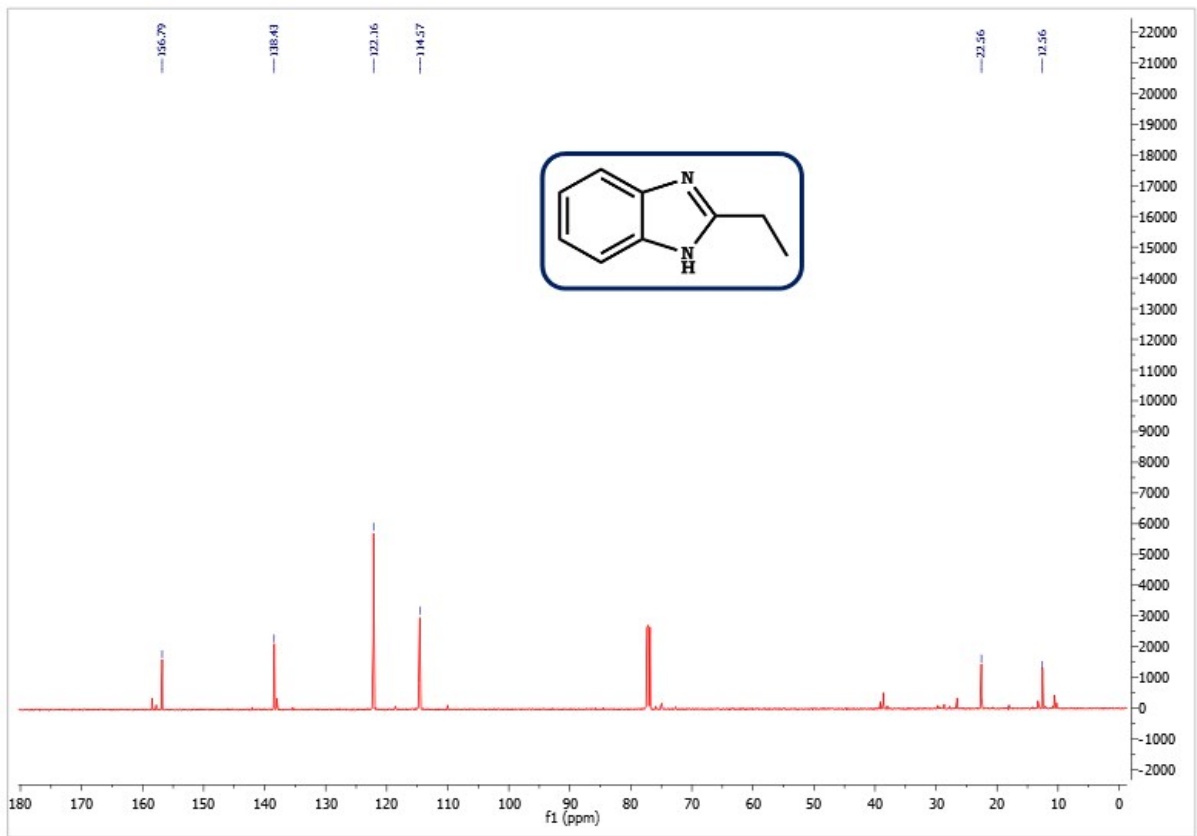

Supplement: c9nj04431k1.pdf [file c9nj04431k1.pdf]
